1 ***Mycobacterium tuberculosis* Rv0991c is a redox-regulated molecular chaperone**

2 Samuel H. Becker<sup>1,2\*</sup>, Kathrin Ulrich<sup>3</sup>, Avantika Dhabaria<sup>4</sup>, Beatrix Ueberheide<sup>4</sup>, William  
3 Beavers<sup>5</sup>, Eric P. Skaars<sup>5</sup>, Lakshminarayan M. Iyer<sup>6</sup>, L. Aravind<sup>6</sup>, Ursula Jakob<sup>3</sup> and  
4 K. Heran Darwin<sup>1,\*</sup>

5 Running title: Redox-regulated chaperone

6 <sup>1</sup>Department of Microbiology, New York University School of Medicine, 430 E. 29<sup>th</sup> Street,  
7 Suite 312, New York, NY 10016, USA

8 <sup>2</sup>Current affiliation: Department of Microbiology and Immunology, University of Minnesota,  
9 2101 6<sup>th</sup> Street SE, Campus Code 2641, Minneapolis, MN 55455

10 <sup>3</sup>Department of Molecular, Cellular, and Developmental Biology, University of Michigan,  
11 1105 N. University Ave, Ann Arbor, MI 48109

12 <sup>4</sup>Proteomics Laboratory, Division of Advanced Research Technologies, New York  
13 University School of Medicine, 430 E. 29<sup>th</sup> Street, Suite 860, New York, NY 10016

14 <sup>5</sup>Vanderbilt Institute of Infection, Immunology, and Inflammation, Vanderbilt University  
15 Medical Center, Nashville, Tennessee, 37037

16 <sup>6</sup>National Center for Biotechnology Information, National Library of Medicine, National  
17 Institutes of Health, Bethesda, MD 20894, USA

18

19 \*Address correspondence to [samuelb51490@gmail.com](mailto:samuelb51490@gmail.com) or [heran.darwin@med.nyu.edu](mailto:heran.darwin@med.nyu.edu)

20

21 **ABSTRACT**

22 The bacterial pathogen *Mycobacterium (M.) tuberculosis* is the leading cause of death by  
23 an infectious disease among humans. Here, we describe a previously uncharacterized  
24 *M. tuberculosis* protein, Rv0991c, as a molecular chaperone that is activated by oxidation.  
25 Rv0991c has homologues in most bacterial lineages and appears to function analogously  
26 to the well-characterized *Escherichia coli* redox-regulated chaperone Hsp33, despite a  
27 dissimilar protein sequence. Rv0991c is transcriptionally co-regulated with *hsp60* and  
28 *hsp70* chaperone genes in *M. tuberculosis*, suggesting that Rv0991c functions with these  
29 chaperones in maintaining protein quality control. Supporting this hypothesis, we found  
30 that, like oxidized Hsp33, oxidized Rv0991c prevents the aggregation of a model unfolded  
31 protein *in vitro*, and promotes its refolding by the *M. tuberculosis* Hsp70 chaperone  
32 system. Furthermore, Rv0991c interacts with DnaK and associates with many other *M.*  
33 *tuberculosis* proteins. Importantly, we found Rv0991c is required for the full virulence of  
34 *M. tuberculosis* in mice. We therefore propose that Rv0991c, which we named "Ruc"  
35 (redox-regulated protein with unstructured C-terminus), represents a founding member of  
36 a new chaperone family that protects *M. tuberculosis* and other species from  
37 proteotoxicity during oxidative stress.

38

39 **IMPORTANCE**

40 *M. tuberculosis* infections are responsible for more than one million human deaths per  
41 year. Developing effective strategies to combat this disease requires a greater  
42 understanding of *M. tuberculosis* biology. As in all cells, protein quality control is essential  
43 for the viability of *M. tuberculosis*, which likely faces proteome stress within a host. Here,  
44 we identify an *M. tuberculosis* protein, Ruc, that gains chaperone activity upon oxidation.  
45 Ruc represents a previously unrecognized family of redox-regulated chaperones found  
46 throughout the bacterial super-kingdom. In addition to elucidating the activity of this  
47 chaperone, we found that Ruc was required for full *M. tuberculosis* virulence in mice. This  
48 work contributes to a growing appreciation that oxidative stress may provide a particular  
49 strain on protein stability in cells, and may likewise play a role in *M. tuberculosis*  
50 pathogenesis.

## 51 INTRODUCTION

52 The folding of a protein that is in a non-native conformation, including during translation  
53 or upon stress-induced denaturation, can be accomplished in all organisms by a set of  
54 chaperones belonging to the Hsp70 and Hsp40 protein families. In bacteria, these  
55 chaperones are called DnaK and DnaJ, respectively [reviewed in (1)]. DnaK is an ATPase  
56 that iteratively binds to and releases protein substrates, allowing them to fold into a native  
57 conformation. In the ATP-bound state, DnaK has high substrate affinity; substrate binding  
58 subsequently induces ATP hydrolysis in a DnaJ-dependent manner. The low-affinity,  
59 ADP-bound DnaK releases the client protein, which has either reached its native structure  
60 or can re-bind to DnaK (2, 3). This cycle of high- and low-affinity substrate-binding states  
61 is facilitated by a nucleotide exchange factor (NEF), which places the DnaK nucleotide-  
62 binding cleft in an open conformation; in bacteria, this activity is accomplished by a single  
63 DnaK-associated NEF, GrpE (4). Besides harboring intrinsic protein folding activity, the  
64 DnaK/DnaJ/GrpE system (DnaKJE) can also deliver substrates to GroEL/GroES  
65 chaperonins (also known as Hsp60/Hsp10), and eukaryotic DnaKJE homologs can  
66 cooperate with proteases to promote the degradation of unfolded substrates (5-7).

67 Proteins in non-native conformations often expose hydrophobic regions that are  
68 prone to aggregation, an event that is toxic to cells. Importantly, aggregate formation  
69 becomes irreversible if DnaKJE cannot access unfolded proteins for refolding. To remedy  
70 this situation, the Hsp100 family of ATP-dependent chaperones (called ClpB in bacteria)  
71 cooperate with DnaKJE by solubilizing proteins within aggregates (8-10). The prevention  
72 of irreversible protein aggregation is also accomplished in all organisms by the small heat  
73 shock protein (sHsp) family of chaperones. Rather than actively dissociating protein

74 aggregates by ATP hydrolysis, sHsps act by simply binding to denatured or misfolded  
75 proteins; the presence of sHsps within protein aggregates allows for efficient refolding by  
76 ATPase chaperones (5, 11-14). Thus, in contrast to “refoldases”, sHsps are “holdases”  
77 that afford cells the ability to rapidly respond to proteotoxic stress in an energy-  
78 independent manner.

79         While DnaKJE, chaperonins, ClpB, and sHsps are all active under steady-state  
80 conditions, there are also non-canonical chaperones that only become active upon  
81 encountering specific stresses. Hsp33 (encoded by *hsfO*), found in both prokaryotes and  
82 eukaryotes, and the eukaryotic Get3 are inactive as chaperones in the normal reducing  
83 environment of the cytoplasm; however, oxidation of cysteine thiols within Hsp33 or Get3  
84 induces conformational changes that allow them to bind to unfolded proteins (6, 15-18).  
85 Hsp33 prevents the irreversible aggregation of unfolded proteins by delivering substrates  
86 to ATPase chaperones for refolding (6). In *E. coli*, this activity is of particular importance  
87 during heat and oxidative stress, during which low ATP levels cause DnaK to enter a  
88 partially unfolded, nucleotide-depleted state; the presence of Hsp33 allows for refolding  
89 by DnaKJE to proceed once a normal temperature and reducing environment is restored  
90 (19). Another bacterial chaperone, RidA, is activated by the oxidant hypochlorous acid  
91 through a mechanism that does not involve oxidation of cysteine thiols, but rather  
92 chlorination of its free amino groups (20). Aside from oxidation, other non-canonical  
93 chaperones have been found to activate upon exposure to high temperatures or acid  
94 [reviewed in (21)].

95         The bacterial pathogen *M. tuberculosis* is currently responsible for the majority of  
96 human infectious disease-related deaths worldwide (22). In this work, we describe our

97 discovery that the uncharacterized *M. tuberculosis* gene Rv0991c encodes a chaperone,  
98 which we named Ruc (redox-regulated chaperone with unstructured C-terminus). Ruc  
99 belongs to a previously unacknowledged, but evolutionarily widespread family of bacterial  
100 proteins with little predicted structural similarity to other chaperones. Upon oxidation, Ruc  
101 is capable of inhibiting protein aggregation and delivering unfolded proteins to DnaKJE  
102 for refolding. Ruc was also found to interact with DnaK in *M. tuberculosis* and, while  
103 dispensable for *in vitro* growth, was required for full *M. tuberculosis* virulence in mice.  
104 These observations ultimately suggest that Ruc is important for the ability of *M.*  
105 *tuberculosis*, and potentially many other bacterial species, to withstand oxidation-  
106 associated proteotoxicity.

107

## 108 **RESULTS**

109 **Ruc induction during heat stress requires the *M. tuberculosis* Pup-proteasome**  
110 **system.** We became interested in Ruc after identifying the transcriptional repressor HrcA  
111 as a putative target of the *M. tuberculosis* Pup-proteasome system (23). In *M.*  
112 *tuberculosis*, HrcA directly represses four genes; three of them encode highly conserved  
113 chaperone proteins of the Hsp60/Hsp10 family, while the fourth gene, *ruc*, encodes a  
114 protein of unknown function (24). In addition to its negative regulation by HrcA, *ruc* is  
115 induced during heat stress by SigH, a sigma factor that also activates transcription of the  
116 Hsp70/Hsp40 genes (25). The DNA sequences to which SigH and HrcA bind upstream  
117 of the *ruc* start codon overlap, suggesting that these two transcriptional regulators  
118 compete for binding to the *ruc* promoter (**Fig. 1A**). We compared Ruc abundance upon  
119 incubation of *M. tuberculosis* at 37°C or 45°C and found that Ruc levels increased

120 dramatically at 45°C, consistent with previously reported transcriptional data (**Fig. 1B,**  
121 **lanes 1 and 2**) (24). The low abundance of Ruc at 37°C is primarily due to repression by  
122 HrcA, given that Ruc was highly abundant in an *hrcA* mutant at this temperature (**Fig. 1B,**  
123 **lane 5**). We observed a further induction of Ruc levels during heat shock in an *hrcA*  
124 mutant (**Fig. 1B, lane 6**). These results corroborate earlier evidence that *ruc* expression  
125 is controlled in two ways: through repression by HrcA and induction by SigH.

126 In a recent study, we proposed that the pupylation and degradation of HrcA by the  
127 *M. tuberculosis* proteasome is required for the full expression of the HrcA regulon. We  
128 previously reported the abundance of HrcA-regulated gene products between a wild type  
129 (WT) *M. tuberculosis* strain and an *mpa* mutant, which cannot degrade pupylated  
130 proteins, and found that GroES, GroEL1, and GroEL2 levels are significantly lower in an  
131 *mpa* strain; however, Ruc abundance is unaffected by disruption of *mpa* under these  
132 conditions. This result suggested that proteasomal degradation of HrcA is not sufficient  
133 for Ruc production under the conditions tested (23); however, this experiment was  
134 performed with cultures incubated at 37°C in minimal medium. We therefore compared  
135 Ruc abundance from the same strains incubated at 45°C and observed a striking defect  
136 in Ruc production in the *mpa* mutant (**Fig. 1C, lane 2**). This result supports the hypothesis  
137 that the proteasomal degradation of HrcA is required for *M. tuberculosis* to robustly induce  
138 *ruc* expression during heat stress.

139

140 **Ruc is required for the full virulence of *M. tuberculosis*.** Previous studies have shown  
141 that *M. tuberculosis* protein quality control pathways are important for its pathogenesis.  
142 *M. tuberculosis* strains deficient in *clpB* or the sHsp-encoding *acr2* have impaired

143 virulence in mice (26, 27), while a mutant lacking HspR, which represses the expression  
144 of *clpB*, *acr2*, and the *hsp70/hsp40* genes, also produces less severe infections (28).  
145 Because *ruc* is co-regulated with essential chaperones, we tested if Ruc were required  
146 for the full virulence of *M. tuberculosis*. We inoculated mice with *M. tuberculosis* strains  
147 by aerosol, and assessed bacterial burden in the lungs and spleen at several time points  
148 following infection. At three- or eight- weeks post-infection, a *ruc* mutant did not display a  
149 significant survival defect compared to a WT strain. However, after 27 weeks, we  
150 recovered approximately five-fold fewer bacteria from the lungs of mice infected with the  
151 *ruc* mutant than from those infected with WT or *ruc* complemented strains (**Figure 1D,**  
152 **top panel**). Bacterial burden in the spleen was not significantly different between  
153 infections at any time point (**Figure 1D, bottom panel**). While the virulence phenotype of  
154 the *ruc* mutant was modest, our results indicate that Ruc may be important for *M.*  
155 *tuberculosis* survival in the lungs during the chronic stage of an infection.

156

### 157 **Ruc is part of a novel protein family found across the bacterial super-kingdom.**

158 According to the mycobacterial genome database MycoBrowser, Ruc is conserved in  
159 both pathogenic and non-pathogenic mycobacteria (29). To determine the broader  
160 phyletic distribution of Ruc among bacteria, we searched the Ruc protein sequence  
161 against a curated collection of 7,423 complete prokaryotic genomes. Ruc is highly  
162 conserved throughout the planctomycetes, chloroflexi, delta- and beta- proteobacteria,  
163 actinobacteria, spirochaetes, and verrucomicrobiae lineages; additionally, Ruc is found  
164 in species within other major bacterial lineages such as gammaproteobacteria, firmicutes



165 and cyanobacteria. This phyletic pattern suggests that Ruc was present in the last  
166 bacterial common ancestor, with rare lateral transfers to archaea (**Table 2**).

167 To define the conserved features of Ruc, we used Phyre2, a program that predicts  
168 secondary and tertiary protein structures based on published sequences and solved  
169 structures (30). Alignment of Ruc with its homologs in other bacteria identified two  
170 conserved domains. The amino (N)-terminal region, consisting of approximately 50 amino  
171 acids, contains four cysteine (Cys) residues arranged in a manner consistent with a zinc  
172 ribbon fold, a domain found in zinc-binding proteins of highly diverse functions (**Fig. 2A**)  
173 (31). The carboxyl (C)-terminal regions of Ruc homologs consist of highly variable  
174 sequences of amino acids ranging in length from approximately seven to 61 residues.  
175 While these C-terminal domains do not share significant similarity at the protein sequence  
176 level, they appear to be uniformly composed of hydrophilic residues with no predicted  
177 secondary structure. Overall, these structural predictions allowed us to conclude that *M.*  
178 *tuberculosis* Ruc and its homologs are likely characterized by a metal-coordinating N-  
179 terminal domain and a disordered C-terminus (**Fig. 2B**).

180 Having established that *ruc* is co-expressed with the Hsp60 and Hsp70 chaperone  
181 system genes in *M. tuberculosis* and is present in diverse bacterial lineages, we next  
182 asked if *ruc* is associated with protein quality control genes in other species. A  
183 comprehensive gene neighborhood analysis among bacteria recovered widespread  
184 associations with chaperone genes, as well as transcription factors and proteases that  
185 regulate chaperone production. In bacteria of the PVC (Plantomycetes, Verrucomicrobia,  
186 Chlamydiae) and FCB (Fibrobacteres, Chlorobi, Bacteroidetes) superphyla, *ruc* is present  
187 in loci encoding DnaK, DnaJ, GrpE, ClpB, alpha-crystallin sHsps (Acr), and HrcA. In

188 bacteria from the Chloroflexi phylum, as well as several unclassified species, Ruc is  
189 additionally associated with GroES/GroEL chaperonins, the chaperone-regulating  
190 protease FtsH, and the redox-regulated chaperone RidA (**Fig. 2C**). The identification of  
191 these conserved genetic linkages, as well as the observation that *ruc* is transcriptionally  
192 co-regulated with essential chaperone genes in *M. tuberculosis*, allowed us to conclude  
193 that Ruc most likely performs a function related to protein folding.

194

195 **Ruc coordinates zinc and is an intrinsically disordered protein.** Based on the  
196 observations that *ruc* is closely associated with essential chaperone genes and that Ruc  
197 contains putative zinc-coordinating cysteines, we hypothesized that Ruc has oxidation-  
198 dependent chaperone activity. Hsp33 and Get3, the only chaperones currently described  
199 whose activity requires cysteine oxidation, each contain a zinc-coordinating domain  
200 consisting of four cysteines. Under oxidizing conditions, these cysteines form  
201 intramolecular disulfide bonds and release zinc, allowing these chaperones to form  
202 complexes with denatured proteins to prevent their irreversible aggregation (15, 17, 32).

203 To begin to test Ruc chaperone activity using *in vitro* assays, we produced and  
204 purified *M. tuberculosis* Ruc from *E. coli* under reducing conditions (Ruc<sub>red</sub>). We oxidized  
205 purified Ruc (Ruc<sub>ox</sub>) by incubation with hydrogen peroxide (H<sub>2</sub>O<sub>2</sub>) and copper chloride  
206 (CuCl<sub>2</sub>), which react to generate hydroxyl radicals that rapidly oxidize cysteines (33). On  
207 an SDS-PAGE gel, Ruc<sub>red</sub> migrated as a single band (**Fig. 3A, lane 1**) while Ruc<sub>ox</sub>  
208 migrated through the gel as multiple species, whose sizes were consistent with the  
209 formation of covalent, intermolecular disulfide bonds (**Fig. 3A, lane 2**). Treatment of Ruc<sub>ox</sub>  
210 with the thiol-reducing agent dithiothreitol (DTT) resulted in a significant loss of higher-

211 molecular weight species, indicating that the oxidation of Ruc cysteines is reversible (**Fig.**  
212 **3A, lane 3**). These results demonstrate that Ruc cysteines form disulfide bonds under  
213 oxidizing conditions to create covalently-linked multimers.

214 In Hsp33, four conserved cysteines coordinate zinc. This zinc binding maintains  
215 Hsp33 in an inactive state, yet allows Hsp33 to become readily activated once an oxidant  
216 is present (32). To determine if Ruc binds zinc using its four cysteines, we used 4-(2-  
217 pyridylazo)resorcinol (PAR), a chemical that chelates free zinc to yield an absorbance  
218 peak at 500 nm ( $A_{500}$ ) (see Materials and Methods). Incubation of either Ruc<sub>red</sub> or Ruc<sub>ox</sub>  
219 with PAR alone did not yield a significant change in  $A_{500}$ , demonstrating that the protein  
220 preparations contained little free zinc; however, addition of N-ethylmaleimide (NEM),  
221 which forms adducts on cysteine thiols, resulted in the release of zinc from Ruc<sub>red</sub> that  
222 could be detected in approximately equimolar abundance to Ruc<sub>red</sub>. Meanwhile, addition  
223 of NEM to Ruc<sub>ox</sub> did not reveal any change in zinc levels (**Fig. 3B**). These data suggest  
224 that under reducing conditions, Ruc cysteines coordinate an atom of zinc, and that this  
225 binding is disrupted when the cysteine thiols are oxidized.

226 Given that PAR can chelate metals in addition to zinc (34), we next determined the  
227 precise identity of the metal bound to Ruc using inductively coupled plasma mass  
228 spectrometry (ICP-MS). In this analysis, we found zinc was present in Ruc<sub>red</sub> preparations  
229 in close to equimolar amounts; when Ruc<sub>red</sub> was treated with NEM prior to ICP-MS, little  
230 Ruc-bound zinc was detected (**Table S1**). Taken together, our metal-binding assays  
231 demonstrated that cysteine thiols in Ruc coordinate a single zinc atom.

232 Aside from the N-terminal zinc ribbon fold domain, the entire C-terminal half of Ruc  
233 was predicted to lack secondary structure (**Fig. 2B**). To evaluate the degree of disorder

234 in Ruc, we measured the secondary structures found in Ruc<sub>red</sub> and Ruc<sub>ox</sub> using circular  
235 dichroism (CD) spectroscopy [reviewed in (35)]. In accordance with structural predictions,  
236 both Ruc<sub>red</sub> and Ruc<sub>ox</sub> yielded a CD spectrum characteristic of disordered proteins (**Fig.**  
237 **3C**) (36). The high degree of disorder present in Ruc, along with our previous observation  
238 that all Ruc homologs are predicted to harbor domains that lack secondary structure,  
239 support a hypothesis whereby the unstructured C-terminal domain somehow contributes  
240 to the function of this protein.

241  
242 **Oxidized Ruc prevents unfolded protein aggregation *in vitro*.** Chaperones are able  
243 to inhibit protein aggregation due to their propensity to bind to unfolded proteins. A  
244 common method for detecting chaperone activity uses purified firefly luciferase, which  
245 denatures and forms irreversible aggregates when heated above 42°C; the presence of  
246 a chaperone during denaturation of luciferase prevents its aggregation (15, 37). We  
247 therefore used this method to test chaperone activity by Ruc. When we incubated  
248 luciferase at 45°C, we observed the formation of precipitates that could be detected by  
249 an increase in light absorbance at 350 nm. In the presence of a fivefold molar excess of  
250 Ru<sub>Cred</sub>, we observed a similar level of luciferase aggregation, demonstrating that Ruc<sub>red</sub>  
251 has little to no chaperone activity. In contrast, the presence of Ruc<sub>ox</sub> during heat  
252 inactivation, either in excess or at an equimolar concentration, significantly inhibited  
253 luciferase aggregation (**Fig. 4A**). When we measured luciferase aggregation using a  
254 different method of detection, dynamic light scattering (38), we also observed the  
255 inhibition of aggregation by Ruc<sub>ox</sub>, but not by Ru<sub>Cred</sub> (**Fig. S1A**). Furthermore, chaperone  
256 activity by Ruc was observed when Ruc was pre-treated with the oxidizing agents

257 hypochlorite or nitric oxide (**Fig. S1B**), further supporting a model whereby oxidized Ruc  
258 counteracts protein aggregation.

259 In the activation process of Hsp33, oxidation induces conformational changes that  
260 expose a disordered region with high affinity for client proteins (39, 40). We therefore  
261 asked if the intrinsically disordered C-terminal domain of Ruc was required for its  
262 chaperone activity. We produced a truncated Ruc variant, Ruc<sub>Nterm</sub> (amino acids 1 through  
263 49), which harbors only the zinc binding motif (**Fig. 4B, lane 2**). Oxidized Ruc<sub>Nterm</sub>  
264 (Ruc<sub>Nterm-ox</sub>) formed a single high-molecular weight species, in contrast to the variety of  
265 multimers observed for Ruc<sub>ox</sub> (**Fig. 4B, lanes 3 and 4**). When we tested the chaperone  
266 activity of oxidized Ruc<sub>Nterm</sub> (Ruc<sub>Nterm-ox</sub>), we found that it was unable to prevent luciferase  
267 aggregation (**Fig. 4C**). Thus, the disordered C-terminus of Ruc is required for its  
268 chaperone activity, either by binding to client protein, by influencing the conformation or  
269 oligomerization state of Ruc, or through a combination of factors.

270 We next asked if replacing the Ruc cysteines, which we predicted would disrupt  
271 zinc coordination, would allow for constitutive Ruc activity in the absence of oxidation, a  
272 phenomenon that was observed for Hsp33 (32). We made cysteine (C) to serine (S)  
273 substitutions in Ruc, generating Ruc<sub>C8S,C11S</sub> and Ruc<sub>C29S,C32S</sub> (see Table 1 for primers and  
274 plasmids). Neither Ruc<sub>C8S,C11S-red</sub> nor Ruc<sub>C29S,C32S-red</sub> were bound to zinc upon their  
275 purification (**Fig. 4D**). When we tested the ability of each reduced Ruc variant to inhibit  
276 luciferase aggregation, we found that both exhibited significant chaperone activity  
277 compared to wild-type Ruc<sub>red</sub> (**Fig. 4E**). Collectively, these results support a model by  
278 which Ruc is in a zinc-bound, inactive state under reducing conditions, and that oxidation

279 and zinc release promotes a conformation of Ruc that allows for its interaction with an  
280 unfolded protein.

281  
282 **Oxidized Ruc promotes protein refolding by *M. tuberculosis* Hsp70/Hsp40**  
283 **chaperones.** Non-ATPase bacterial chaperones such as Hsp33 and sHsps prevent  
284 irreversible protein aggregation *in vivo*; critically, this function relies on the ability of ATP-  
285 dependent chaperones to eventually refold substrates that are bound by these non-  
286 ATPase chaperones (5, 6, 41). To further understand the potential role of Ruc in *M.*  
287 *tuberculosis* protein quality control, we tested if Ruc could promote protein refolding by  
288 *M. tuberculosis* DnaKJE. To test this hypothesis, we heated luciferase either alone or in  
289 the presence of Ruc<sub>red</sub> or Ruc<sub>ox</sub>; after bringing the reaction to room temperature and  
290 adding purified *M. tuberculosis* DnaK, DnaJ2, and GrpE under reducing conditions, we  
291 monitored refolding by measuring luciferase activity over time. Only minimal refolding of  
292 luciferase by DnaKJE was observed when luciferase was denatured in the absence of a  
293 chaperone, a result that was expected based on previous studies (5, 6, 11, 41). By  
294 contrast, significant DnaKJE-mediated refolding of luciferase was achieved when  
295 luciferase was denatured in the presence of Ruc<sub>ox</sub> (**Fig. 5A**). Consistent with its inability  
296 to prevent luciferase aggregation (**Fig. 4A**), Ruc<sub>red</sub> had no significant effect on luciferase  
297 refolding (**Fig. 5A**). These results demonstrate that unfolded proteins that are bound by  
298 Ruc under oxidizing conditions can be delivered to the DnaKJE system for refolding.

299 After establishing the chaperone activity of Ruc *in vitro*, we sought to better  
300 understand the specific role of Ruc in *M. tuberculosis* physiology by identifying potential  
301 protein interaction partners *in vivo*. To capture such interactions, we produced Ruc with

302 a hexahistidine-FLAG tandem affinity purification tag (Ruc<sub>TAP</sub>) in *M. tuberculosis*. When  
303 we performed a two-step purification of Ruc<sub>TAP</sub> from *M. tuberculosis* lysates under native  
304 conditions, we observed that a second protein co-purified with Ruc<sub>TAP</sub> (**Fig. 5B**); mass  
305 spectrometry identified this protein as DnaK (see Materials and Methods). We validated  
306 the identity of DnaK in Ruc<sub>TAP</sub> purifications by immunoblotting with a monoclonal antibody  
307 to DnaK (**Fig. S2A**). Importantly, this result was specific to Ruc<sub>TAP</sub>, as DnaK did not co-  
308 purify with another small TAP-tagged protein, PrcB<sub>TAP</sub> (**Fig. S2A**). This apparent  
309 interaction between Ruc and DnaK in *M. tuberculosis* lysates supports the hypothesis  
310 that Ruc is directly involved in maintaining protein folding by the DnaKJE system *in vivo*.

311 Notably, Ruc<sub>TAP</sub> interacted with DnaK under native purification conditions in which  
312 no oxidants were added. Given that Ruc chaperone function is activated under oxidizing  
313 conditions, we next sought to capture the interaction of Ruc with endogenous client  
314 proteins by purifying Ruc<sub>TAP</sub> from bacteria subjected to oxidative stress, a condition that  
315 could promote association of Ruc<sub>TAP</sub> with unfolded substrates. However, when we purified  
316 Ruc<sub>TAP</sub> from *M. tuberculosis* cultures that were exposed to a sub-lethal concentration of  
317 H<sub>2</sub>O<sub>2</sub> and CuCl<sub>2</sub> at 45°C, we did not observe any additional proteins co-purifying with  
318 Ruc<sub>TAP</sub> (**Fig. S2B**). We hypothesized that intact *M. tuberculosis* rapidly reverses oxidation,  
319 such that interactions between Ruc<sub>COX</sub> and unfolded client proteins are too transient to  
320 capture. We instead treated lysates of Ruc<sub>TAP</sub>-producing *M. tuberculosis* with H<sub>2</sub>O<sub>2</sub> and  
321 CuCl<sub>2</sub>, and found that oxidation resulted in the association of many *M. tuberculosis*  
322 proteins with Ruc<sub>TAP</sub> (**Fig. 5C, lane 2**). To determine the identity of these putative clients  
323 of Ruc, we performed proteomic mass spectrometry to identify the proteins that co-  
324 purified with Ruc<sub>TAP</sub> under oxidizing, but not native conditions (**Table S2**). Proteins that

325 co-purified with activated RucTAP were associated with a diverse range of functions  
326 including nitrogen and carbon metabolism, electron transport, oxidative stress, and  
327 transcriptional regulation; thus, Ruc chaperone activity likely provides a general protective  
328 effect on the *M. tuberculosis* proteome during oxidation. Importantly, while these results  
329 suggest that Ruc can interact with a wide variety of proteins, we are currently unable to  
330 verify that the same interactions take place within bacteria under the same conditions.

331

332 **Ruc is not essential for *M. tuberculosis* resistance to oxidation.** During an infection,  
333 *M. tuberculosis* primarily resides within macrophages. These and other immune cells are  
334 capable of mounting an antimicrobial response that includes the generation of reactive  
335 oxygen species (ROS), reactive nitrogen intermediates (RNI), and hypochlorite. These  
336 molecules, all of which can react with cysteine thiols, can confer lethal stress upon  
337 infecting pathogens [reviewed in (42)]. Animals defective in the ability to produce ROS,  
338 RNI, and hypochlorite are more susceptible to bacterial and fungal pathogens (43-46),  
339 and human deficiency in ROS production is associated with susceptibility to  
340 mycobacterial infections (47).

341 Our data thus far led us to hypothesize that Ruc contributes to *M. tuberculosis*  
342 virulence by protecting bacteria from protein aggregation during oxidative stress.  
343 Therefore, we sought to test if a *ruc* mutant was more susceptible to a variety of oxidative  
344 stress conditions *in vitro*. We challenged *M. tuberculosis* strains incubated at 45°C with  
345 either peroxide, hypochlorite, plumbagin (which generates superoxide radicals in cells)  
346 (48), or acidified nitrite (which produces NO) (49) and measured the approximate lethal  
347 dose of each compound. Interestingly, the WT and *ruc* mutant strains were equally



348 susceptible to killing under all stress conditions tested (**Fig. S3**). Thus, despite the  
349 observation that the *ruc* mutant has a subtle virulence defect in mice, we were unable to  
350 conclusively determine if Ruc protects *M. tuberculosis* from the various oxidative stress  
351 conditions that might be encountered in a host. Given that *M. tuberculosis* has multiple  
352 mechanisms for maintaining bacterial redox balance, including thioredoxins, mycothiol  
353 and catalase [reviewed in (50)], it is possible that the contribution of Ruc to *M. tuberculosis*  
354 fitness only becomes apparent under conditions in which these antioxidant systems are  
355 not fully effective; notably, the requirement for Hsp33 for *E. coli* resistance to oxidative  
356 stress is observed only after the thioredoxin system is genetically disrupted (16).

357

## 358 **DISCUSSION**

359 In this study, we identified Ruc as the founding member of a new family of bacterial redox-  
360 regulated chaperones. Prior to this work, Hsp33 and RidA were the only other proteins  
361 described in bacteria whose chaperone activity is dependent on oxidation. Remarkably,  
362 however, Ruc shares no sequence similarity to these proteins aside from the presence of  
363 four zinc-coordinating cysteines, a feature of Hsp33. Reduced, inactive Hsp33 compactly  
364 folds into two globular domains; a combination of high temperature and oxidation causes  
365 partial unfolding of the protein, exposing a disordered region with high affinity for  
366 substrates (39, 40). The Hsp33 zinc-binding motif, while essential for inducing  
367 conformational changes upon oxidation, does not directly participate in substrate binding  
368 (39). In contrast to Hsp33, Ruc likely has a single, small globular region, and is predicted  
369 to be intrinsically disordered across more than half the length of the protein. We therefore  
370 expect that the mechanism of its activation is distinct from that of Hsp33. Our observation

371 that Ruc<sup>red</sup> has no chaperone activity could suggest that the disordered domain of Ruc<sup>red</sup>  
372 is kept in a partially occluded state, perhaps by interacting with other regions of the  
373 protein, and would therefore be unavailable for binding a client protein until oxidation  
374 takes place. Structural studies of Ruc, both alone and in complex with a substrate, will be  
375 necessary to determine the precise mechanism of its activation.

376 It is well-established that Hsp33 and sHsps deliver unfolded proteins to ATPase  
377 chaperones for refolding (5, 6, 41). Here, we describe a similar function of Ruc in  
378 promoting protein folding by *M. tuberculosis* DnaKJE (**Fig. 6**). Importantly, despite strong  
379 evidence that proteins can be directly transferred from non-ATPase to ATPase  
380 chaperones, a direct interaction between a holdase and a foldase has never been  
381 observed (14). Thus, our ability to capture the interaction of Ruc and DnaK, even in the  
382 absence of an environmental stress, may present a new opportunity to understand  
383 mechanisms by which holdases transfer their substrates to DnaK.

384 Supporting the hypothesis that Ruc contributes to *M. tuberculosis* pathogenesis,  
385 a previous screen to identify genes required for *M. tuberculosis* virulence in mice found  
386 that bacteria with transposon insertions in *ruc* are defective for *in vivo* growth during mixed  
387 infections (51). In another study, mice infected with an *M. tuberculosis* strain containing  
388 a deletion-disruption of Rv0990c (encoding Hsp22.5), the gene directly downstream of  
389 *ruc*, had a lower bacterial burden during the later stages of infection and increased time  
390 to death compared to mice infected with a WT strain; however, the phenotypes in this  
391 study could not be fully complemented (52). Conceivably, the Rv0990c mutation could  
392 have affected Ruc production, which might explain the incomplete complementation of  
393 the Rv0990c mutation to fully restore virulence.

394           The widespread conservation of Ruc homologues suggests that this protein  
395 protects bacteria against one or more common environmental stresses, and not just host-  
396 exclusive factors. Notably, with the exception of a single species, Hsp33 homologs are  
397 absent from the Actinobacteria; by contrast, Ruc homologs are found throughout this  
398 phylum, including the majority of mycobacterial species [STRING database (53)]. We  
399 therefore speculate that for these species, Ruc fulfills a similar role to that of Hsp33:  
400 preventing the irreversible aggregation of unfolded proteins during oxidative stress, a  
401 condition in which ATP depletion or direct thiol modification of DnaK may render DnaKJE-  
402 mediated refolding impossible (6, 19, 54). If this scenario were indeed supported by  
403 further studies, then Ruc and Hsp33, which appear to be structurally unrelated, may  
404 represent products of convergent evolution.

405

## 406 **Materials and Methods**

407 **Strains, plasmids, primers, and culture conditions.** See Table 1 for strains, plasmids,  
408 and primers used in this work. Reagents used for making all buffers and bacterial media  
409 were purchased from Thermo Fisher Scientific, unless otherwise indicated. *M.*  
410 *tuberculosis* was grown in "7H9c" [BD Difco Middlebrook 7H9 broth with 0.2% glycerol  
411 and supplemented with 0.5% bovine serum albumin (BSA), 0.2% dextrose, 0.085%  
412 sodium chloride, and 0.05% Tween-80]. For the experiment in Figure 1C, bacteria were  
413 grown in Proskauer-Beck minimal medium supplemented with asparagine and a similar  
414 result was observed in 7H9c. For solid media, *M. tuberculosis* was grown on "7H11" agar  
415 (BD Difco Middlebrook 7H11) containing 0.5% glycerol and supplemented with 10% final  
416 volume of BBL Middlebrook OADC Enrichment. For selection of *M. tuberculosis*, the

417 following antibiotics were used as needed: kanamycin 50 µg/ml, hygromycin 50 µg/ml. *E.*  
418 *coli* was cultured in BD Difco Luria-Bertani (LB) broth or on LB Agar. Media were  
419 supplemented with the following antibiotics as needed: kanamycin 100 µg/ml, hygromycin  
420 150 µg/ml, ampicillin 200 µg/ml.

421 Primers used for PCR amplification or sequencing were purchased from Life  
422 Technologies and are listed in Table 1. DNA was PCR-amplified using either Phusion  
423 (New England Biolabs; NEB), Pfu (Agilent), or Taq (Qiagen) according to the  
424 manufacturers' instructions. PCR products were purified using the QIAquick Gel  
425 Extraction Kit (Qiagen). Plasmids encoding His<sub>6</sub>-SUMO-Ruc, His<sub>6</sub>-SUMO-Ruc<sup>Nterm</sup>, His<sub>6</sub>-  
426 SUMO-Ruc<sup>C8S,C11S</sup> and His<sub>6</sub>-SUMO-Ruc<sup>C29S,C32S</sup> were made using splicing by overlap  
427 extension (SOE) PCR (55). Restriction enzymes and T4 DNA ligase were purchased from  
428 NEB. The following plasmids were made by PCR-amplifying genes from *M. tuberculosis*  
429 DNA using the indicated primers and cloning amplification products into their respective  
430 vectors: pET24b(+)-Rv0991c-his<sub>6</sub> (NdeI-Rv0991c-F, HindIII-Rv0991c-R), pMV306kan-  
431 Rv0991c (HindIII-Rv0991c-F, XbaI-Rv0991c-R), pOLYG-Rv0991c-TAP (HindIII-  
432 Rv0991c-F, XbaI-Rv0991c-TAP-R), pAJD107-Rv0991c (NdeI-Rv0991c-F, BglII-  
433 Rv0991c-R), pAJD107-Rv0991c-C8S,C11S (NdeI-Rv0991c-C8S,C11S-F, BglII-  
434 Rv0991c-R). pET24b(+)-Rv0991c and pET24b(+)-Rv0991c-C8S,C11S were made by  
435 subcloning the Rv0991c gene from pAJD107-Rv0991c and pAJD107-Rv0991c-  
436 C8S,C11S into pET24b(+), respectively. pET24b(+)-HisSUMO-*ruc* was made by first  
437 PCR-amplifying HisSUMO from pEcTL02 using primers T7-F and SUMO-Ruc-soeR,  
438 secondly amplifying *ruc* from *M. tuberculosis* DNA using SUMO-Ruc-soeF and Ruc-KpnI-  
439 R, and finally performing SOE PCR using these two amplification products along with

440 primers T7-F and Ruc-Kpn-R. The SOE PCR product was then cloned into pET24b(+).  
441 pET24b(+)-HisSUMO-*ruc*-Nterm was made similarly, except that the primer RucNterm-  
442 KpnI-R substituted for Ruc-KpnI. pET24b(+)-HisSUMO-*ruc*-C29S,C32S was made by  
443 SOE PCR using primers T7-F, T7-term, Rv0991c-C29SC32S-F and Rv0991c-  
444 C29SC32S-R, with pET24b(+)-HisSUMO-*ruc* as the PCR template. pET24b(+)-  
445 HisSUMO-*ruc*-C8SC11S was made similarly to pET-24b(+)-HisSUMO-*ruc*, except that  
446 the amplification product from primers SUMO-Ruc-soeF and Ruc-KpnI-R was made using  
447 pET24b(+)-Rv0991c-C8S,C11S as a template.

448 Calcium chloride-competent *E. coli* DH5 $\alpha$  was transformed with ligations. All  
449 plasmids were purified from *E. coli* using the QIAprep Spin Miniprep Kit. All plasmids  
450 made by PCR cloning were sequenced by GENEWIZ, Inc. to ensure the veracity of the  
451 cloned sequence. Plasmids were transformed into *M. tuberculosis* by electroporation as  
452 previously described (56). Single-colony transformants were isolated on 7H11 agar with  
453 antibiotic selection.

454

455 **Protein purification, antibody production, and immunoblotting.** Ruc-His<sub>6</sub> was  
456 produced in *E. coli* strain ER2566; His<sub>6</sub>-SUMO-Ruc, His<sub>6</sub>-SUMO-RucNterm, His<sub>6</sub>-SUMO-  
457 RucC8S,C11S, His<sub>6</sub>-SUMO-RucC29S,C32S, His<sub>6</sub>-SUMO-DnaK, His<sub>6</sub>-SUMO-DnaJ2, His<sub>6</sub>-  
458 SUMO-GrpE, and His<sub>6</sub>-Ulp1 were produced in *E. coli* strain BL21. Proteins were purified  
459 from *E. coli* by affinity chromatography using Ni-NTA agarose (Qiagen) according to the  
460 manufacturer's instructions (Ruc-His<sub>6</sub> was purified under urea denaturing conditions).  
461 Production of His<sub>6</sub>-SUMO-DnaK, His<sub>6</sub>-SUMO-DnaJ2, and His<sub>6</sub>-SUMO-GrpE in *E. coli* was

462 performed as previously described (11). To make rabbit polyclonal immune serum,  
463 approximately 200  $\mu$ g Ruc-His<sub>6</sub> was used to immunize rabbits (Covance, Denver, PA).

464 *M. tuberculosis* Ruc was prepared from *E. coli* using two methods that yielded  
465 approximately equal purity; both methods also resulted in identical Ruc chaperone activity  
466 upon oxidation of the protein. In the first method, untagged Ruc was purified from strain  
467 ER2566. A 500 ml culture was grown at 37°C with shaking to an OD<sub>600</sub> of 0.5, and then  
468 cooled to room temperature. 1 mM isopropyl  $\beta$ -D-thiogalactopyranoside (IPTG) was  
469 added, and the culture was grown further at 30°C with shaking for five hours. Bacteria  
470 were collected by centrifugation, resuspended in 25 ml of 50 mM Tris, pH 8.0, and lysed  
471 by sonication. After removing insoluble material by centrifugation, ammonium sulfate was  
472 added to the lysate to 70% w/v, and the suspension was stirred for 30 minutes at 4°C to  
473 precipitate proteins. The precipitate was collected by centrifugation, resuspended in 3 ml  
474 of 50 mM Tris, pH 8.0, and dialyzed against four liters of the same buffer at 4°C overnight  
475 to remove residual ammonium sulfate and dissolve proteins. Ruc has a predicted  
476 isoelectric point of approximately 9, and was therefore one of the few positively-charged  
477 proteins in the bacterial protein extract. Taking advantage of this fact, Ruc was purified to  
478 homogeneity by passing the protein extract over a Q Sepharose anion exchange column  
479 (GE); Ruc immediately exited the column in flow-through fractions. To ensure that the  
480 protein was fully reduced after purification, we treated Ruc with 5 mM DTT for 30 minutes  
481 at 30°C. An Amicon centrifugal filter unit (Millipore) was used to thoroughly buffer-  
482 exchange the protein into 50 mM HEPES, pH 7.5. The complete removal of DTT was  
483 confirmed by measuring the presence of DTT in the filter flowthrough using Ellman's

484 reagent (Thermo Scientific) according to the manufacturer's instructions. The final protein  
485 preparation (Ruc<sub>red</sub>) was stored in the same buffer at -20°C.

486         The second method of preparing Ruc from *E. coli* used a cleavable affinity tag, and  
487 was also used to obtain Ruc<sub>Nterm</sub>, Ruc<sub>C8S,C11S</sub>, and Ruc<sub>C29S,C32S</sub>. His<sub>6</sub>-SUMO-Ruc, His<sub>6</sub>-  
488 SUMO-Ruc<sub>Nterm</sub>, His<sub>6</sub>-SUMO-Ruc<sub>C8S,C11S</sub>, and His<sub>6</sub>-SUMO-Ruc<sub>C29S,C32S</sub> were each  
489 purified from strain BL21(DE3) in the following manner. A 500 ml culture was grown at  
490 37°C with shaking to an OD<sub>600</sub> of 0.3 to 0.4, then transferred to a 25°C shaking incubator  
491 and grown to an OD<sub>600</sub> of 0.5. 1 mM IPTG was added, and the culture were further grown  
492 for 5 hours. Purified protein was prepared from bacteria using Ni-NTA resin, and then  
493 exchanged into a SUMO cleavage buffer of 50 mM Tris, 150 mM NaCl, 2 mM dithiothreitol  
494 (DTT), pH 8.0. A 1:100 volume of purified His<sub>6</sub>-Ulp1 (SUMO protease) was added, and  
495 the reaction was incubated for 30 minutes at 30°C. His<sub>6</sub>-Ulp1 and His<sub>6</sub>-SUMO were then  
496 removed by incubating the mixture with Ni-NTA resin and saving the supernatant fraction;  
497 clearance of tagged protein was performed twice to yield pure, native Ruc and truncation  
498 or substitution variants. Proteins were buffer-exchanged into TBS buffer (50 mM Tris, 150  
499 mM NaCl, pH 8.0) using centrifugal filters, and the absence of residual DTT was  
500 confirmed using Ellman's reagent. The final protein preparations (Ruc<sub>red</sub>, Ruc<sub>Nterm-red</sub>,  
501 Ruc<sub>C8S,C11S-red</sub>, and Ruc<sub>C29S,C32S-red</sub>) were stored in TBS at -20°C.

502         *M. tuberculosis* DnaK, DnaJ2, and GrpE were prepared by removing the affinity  
503 tags from His<sub>6</sub>-SUMO-DnaK, His<sub>6</sub>-SUMO-DnaJ2, and His<sub>6</sub>-SUMO-GrpE in the same  
504 manner as described for His<sub>6</sub>-SUMO-Ruc, except that the native proteins were buffer-  
505 exchanged into 50 mM Tris, 150 mM KCl, 20 mM MgCl<sub>2</sub>, 2 mM DTT, pH 7.5 before  
506 storage at -20°C.

507 Separation of proteins in *in vitro* assays and in *M. tuberculosis* lysates was  
508 performed using 15% sodium dodecyl sulfate-polyacrylamide (SDS-PAGE) gels, with the  
509 following exceptions: for Figures 1B and 1C, anykD Mini-PROTEAN TGX precast protein  
510 gels (Bio-Rad) were used. Bio-Safe Coomassie Stain (Bio-Rad) was used to stain gels.  
511 For preparing samples for SDS-PAGE gels in Figures 3A and 4B, purified proteins were  
512 mixed with 4 × non-reducing SDS buffer (250 mM Tris pH 6.8, 2% SDS, 40% glycerol,  
513 1% bromophenol blue) to a 1 × final concentration, and samples were boiled for five  
514 minutes. For lane 3 in Figure 3A, DTT was added to the sample to a 2 mM final  
515 concentration prior to boiling. For immunoblots, proteins were transferred from protein  
516 gels to nitrocellulose membranes (GE Amersham), and analyzed by immunoblotting as  
517 indicated. Due to Ruc's high isoelectric point, Ruc was transferred to membranes using  
518 100 mM N-cyclohexyl-3-aminopropanesulfonic acid (CAPS) buffer in 10% methanol. In  
519 Figures 1B and 1C, Ruc and PrcB immunoblots were from the same membrane. For  
520 detecting *M. tuberculosis* DnaK we used a monoclonal antibody from BEI Resources (NR-  
521 13609) at a concentration of 1:1000 in 3% BSA in 25 mM Tris-Cl/125 mM NaCl/0.05%  
522 Tween 20 buffer (TBST). Polyclonal antibodies against PrcB (23) and Ruc were used  
523 similarly. Secondary antibodies HRP-conjugated goat anti-rabbit IgG F(ab')<sub>2</sub> and HRP-  
524 conjugated anti-mouse IgG(H+L) were purchased from Thermo Fisher Scientific. All  
525 antibodies were made in TBST with 3% BSA. Immunoblots were developed using  
526 SuperSignal West Pico PLUS chemiluminescent substrate (Thermo Fisher Scientific) and  
527 imaged using a Bio-Rad ChemiDoc system.  
528



529 **Preparation of *M. tuberculosis* extracts for immunoblotting.** *M. tuberculosis* cultures  
530 were grown to an OD<sub>580</sub> of 0.3. Equal amounts of bacteria were harvested by  
531 centrifugation, resuspended in TBS, and transferred to a tube containing 250 µl of 0.1  
532 mm zirconia beads (BioSpec Products). Bacteria were lysed using a mechanical bead-  
533 beater (BioSpec Products). Whole lysates were mixed with 4 × reducing SDS sample  
534 buffer (250 mM Tris pH 6.8, 2% SDS, 20% 2-mercaptoethanol, 40% glycerol, 1%  
535 bromophenol blue) to a 1 × final concentration, and samples were boiled for 5 minutes.  
536 For preparing lysates from *M. tuberculosis* grown in 7H9, which contains BSA, an  
537 additional wash step with PBS-T was done prior to resuspension of bacteria in lysis buffer.  
538

539 **Mouse infections.** Six to eight-week old female C57BL6/J mice (Jackson Laboratories)  
540 were each infected with ~200-400 *M. tuberculosis* bacilli by the aerosol infection route.  
541 Bacterial burden in organs was determined as previously described (57); briefly, at the  
542 time points indicated in the text, lung pairs and spleens were harvested from 3 to 5 mice,  
543 and were each homogenized and plated on 7H11 agar to determine CFU per organ. All  
544 procedures were performed with the approval of the New York University Institutional  
545 Animal Care and Use Committee.

546  
547 **Preparation of Ruc<sub>ox</sub> and Ruc<sub>Nterm-ox</sub>.** 8.8 M H<sub>2</sub>O<sub>2</sub> stock solution, stored at -20°C, was  
548 diluted to 200 mM in deionized water just prior to the oxidation reaction. 100 µM Ruc<sub>red</sub> or  
549 Ruc<sub>Nterm-red</sub> were incubated at 37°C; for 3 min, after which 50 µM of copper chloride was  
550 added, followed by 2 mM H<sub>2</sub>O<sub>2</sub>. The reaction was incubated for 10 minutes; H<sub>2</sub>O<sub>2</sub> and  
551 copper chloride were removed using a Zeba Spin 7K MWCO desalting centrifuge column

552 (Fisher Scientific) pre-equilibrated with the original Ruc<sub>red</sub> storage buffer, according to the  
553 manufacturer's instructions. Treatment of Ruc with 2 mM DEANO (Sigma-Aldrich) or  
554 NaOCl (Figure S1B) was performed identically, except that Ruc was treated for 20  
555 minutes (NaOCl) or two hours (DEANO) as described for Hsp33 (58).

556

557 **Spectrophotometric detection of zinc in Ruc preparations.** Quantification of the zinc  
558 coordinated by Ruc cysteines was performed using 4-(2-pyridylazo)resorcinol (PAR)  
559 using a previously established method (32, 59), except that zinc-cysteine complexes were  
560 disrupted using N-ethylmaleimide (NEM) (Pierce) according to the manufacturer's  
561 instructions. 25  $\mu$ M Ruc was mixed with 100  $\mu$ M PAR either in the absence or presence  
562 of 2 mM NEM. Reactions were incubated at room temperature for 1 hour. Zn(PAR)<sub>2</sub>  
563 complexes were detected by A<sub>500</sub> using a NanoDrop spectrophotometer. To obtain a  
564 precise concentration of zinc in protein preparations, serial dilutions of zinc sulfate  
565 prepared in matched buffers (with or without NEM) were used to prepare standard curves.  
566 Three technical replicates were performed for each condition.

567

568 **Metal analysis of Ruc preparations using inductively-coupled plasma mass**  
569 **spectrometry (ICP-MS).** Elemental quantification on purified Ruc with and without NEM  
570 and a buffer control was performed using an Agilent 7700 inductively coupled plasma  
571 mass spectrometer (Agilent, Santa Clara, CA) attached to a Teledyne CETAC  
572 Technologies ASX-560 autosampler (Teledyne CETAC Technologies, Omaha, NE). The  
573 following settings were fixed for the analysis Cell Entrance = -40 V, Cell Exit = -60 V, Plate  
574 Bias = -60 V, OctP Bias = -18 V, and collision cell Helium Flow = 4.5 mL/min. Optimal

575 voltages for Extract 2, Omega Bias, Omega Lens, OctP RF, and Deflect were determined  
576 empirically before each sample set was analyzed. Element calibration curves were  
577 generated using ARISTAR ICP Standard Mix (VWR, Radnor, PA). Samples were  
578 introduced by peristaltic pump with 0.5 mm internal diameter tubing through a MicroMist  
579 borosilicate glass nebulizer (Agilent). Samples were initially up taken at 0.5 rps for 30 s  
580 followed by 30 s at 0.1 rps to stabilize the signal. Samples were analyzed in Spectrum  
581 mode at 0.1 rps collecting three points across each peak and performing three replicates  
582 of 100 sweeps for each element analyzed. Sampling probe and tubing were rinsed for 20  
583 s at 0.5 rps with 2 % nitric acid between every sample. Data were acquired and analyzed  
584 using the Agilent Mass Hunter Workstation Software version A.01.02.

585

586 **Circular dichroism (CD) spectrophotometry.** CD measurements were performed using  
587 a Jasco J-1500 CD spectrophotometer as per the manufacturer's instructions. To prepare  
588 samples, Ruc was buffer-exchanged into 20 mM KH<sub>2</sub>PO<sub>4</sub>, pH 7.5, diluted to 20 μM, and  
589 transferred to a quartz cuvette. The spectrophotometer parameters were set as follows:  
590 CD scale 200 mdeg/1.0 dOD, integration time 1 second, bandwidth 1 nm. The voltage  
591 was monitored simultaneously and remained below 700 V.

592

593 **Luciferase aggregation and refolding assays.** The chaperone activity of Ruc was  
594 measured by testing its ability to limit the aggregation of heat-denatured luciferase, a  
595 previously established method (15, 37). For experiments in Figures 4A, 4C, and 4E,  
596 aggregation was determined by measuring absorbance at 350 nm (A<sub>350</sub>) (60, 61). Firefly  
597 luciferase (Promega) was diluted to 2 μM in TBS and mixed in a microcentrifuge tube with

598 concentrations of Ruc indicated in the text and figures, or TBS alone, to a final volume of  
599 20  $\mu$ l. The tube was then incubated in a 45°C heat block. Immediately before incubation  
600 and at the indicated times, a 2  $\mu$ l volume was removed and  $A_{350}$  was measured using a  
601 NanoDrop spectrophotometer. Aggregation assays were performed using three technical  
602 replicates per condition. For the experiment in Figure S1A, luciferase aggregation was  
603 measured using light scattering as previously described (15).

604 Refolding of heat-denatured luciferase by *M. tuberculosis* DnaKJE was performed  
605 using a protocol adapted from (11). *M. tuberculosis* encodes two DnaJ homologs, DnaJ1  
606 and DnaJ2, which both promote DnaK-mediated protein folding *in vitro* (11); DnaJ2 was  
607 used in this study because we found that DnaJ1 exhibited poor solubility when purified  
608 from *E. coli*. For the denaturation step, luciferase was diluted to 0.1  $\mu$ M in TBS, either  
609 alone or mixed with 4  $\mu$ M RuC<sub>red</sub> or RuC<sub>ox</sub>, in glass vials. Denaturation was performed by  
610 placing vials in a 45°C water bath for 20 minutes. For the refolding step, we used glass-  
611 coated 96-well plates in which 5  $\mu$ l of denaturation reaction was mixed with 15  $\mu$ l of  
612 refolding reaction buffer [50 mM Tris pH 7.5, 150 mM KCl, 20 mM MgCl<sub>2</sub>, 2 mM DTT, 1  
613 mg/ml BSA (Sigma-Aldrich), 2 mM Mg<sub>2+</sub>-ATP] or refolding reaction buffer containing 4  $\mu$ M  
614 DnaK, 2  $\mu$ M DnaJ2, and 2  $\mu$ M GrpE. Plates were incubated at 25°C. Luciferase activity  
615 was measured immediately upon initiating the refolding step (0 minutes) and at all other  
616 time points indicated in Figure 5A by transferring 2  $\mu$ l of each reaction into a white opaque  
617 96-well plate and adding 100  $\mu$ l of luciferase assay mix (100 mM KH<sub>2</sub>PO<sub>4</sub> pH 7.5, 25 mM  
618 glycyl glycine, 0.2 mM EDTA, 2 mM Mg<sub>2+</sub>-ATP, 0.5 mg/ml BSA, 70  $\mu$ M luciferine).  
619 Luminescence was measured using a plate reader (PerkinElmer EnVision). For  
620 calculating the percent of native luciferase activity for all reactions at each time point, a

621 control reaction was included in which 0.1  $\mu$ M luciferase was diluted into TBS in a glass  
622 vial but kept at 4°C, rather than heated, during the denaturation step. This control reaction  
623 was mixed with refolding reaction buffer as described above, and luminescence was  
624 measured at each time point in Figure 5A to determine 100% native luciferase activity.

625

626 **Tandem affinity purification of *M. tuberculosis* proteins.** Purifications of TAP-tagged  
627 proteins from *M. tuberculosis* were performed under low-salt conditions as described (62).  
628 The following changes were made to the protocol: 100  $\mu$ l of packed Ni-NTA beads and  
629 100  $\mu$ l of M2 anti-FLAG affinity gel were used; 100  $\mu$ l of 100  $\mu$ M 3X FLAG peptide was  
630 used for the final elution. For capturing Ruc<sub>TAP</sub> interactions with other *M. tuberculosis*  
631 proteins, *M. tuberculosis* lysates were incubated at 45°C for 10 minutes either in the  
632 absence (Figure 5C, lane 1) or presence (Figure 5C, lane 2) of 2 mM H<sub>2</sub>O<sub>2</sub> and 50  $\mu$ M  
633 CuCl<sub>2</sub>; purifications were subsequently performed as described above. Samples were  
634 boiled in 4  $\times$  reducing SDS sample buffer prior to running SDS-PAGE gels.

635

636 **Protein mass spectrometry.** To identify of the ~70 kDa protein pulled down by Ruc<sub>TAP</sub>  
637 (Figure 5B), the band was excised from a SDS-PAGE gel and processed as previously  
638 described (63). To determine the identity of proteins enriched in Ruc<sub>TAP</sub> purifications  
639 under oxidizing conditions (Figure 5C; Table S2), Ruc<sub>TAP</sub> purifications under native or  
640 oxidizing conditions were performed in three biological replicates. Affinity purified samples  
641 were reduced, alkylated, digested with trypsin and desalted as previously described (23,  
642 63). The peptide eluates in all cases were concentrated in the SpeedVac and stored at -  
643 80°C. Aliquots of each sample were loaded onto a trap column (Acclaim® PepMap 100

644 pre-column, 75  $\mu\text{m} \times 2\text{ cm}$ , C18, 3  $\mu\text{m}$ , 100  $\text{\AA}$ , Thermo Scientific) connected to an  
645 analytical column (EASY-Spray column, 50  $\text{m} \times 75\ \mu\text{m}$  ID, PepMap RSLC C18, 2  $\mu\text{m}$ ,  
646 100  $\text{\AA}$ , Thermo Scientific) using the autosampler of an Easy nLC 1000 (Thermo Scientific)  
647 with solvent A consisting of 2% acetonitrile in 0.5% acetic acid and solvent B consisting  
648 of 80% acetonitrile in 0.5% acetic acid. The peptide mixture was gradient eluted into the  
649 Orbitrap QExactive HF-X mass spectrometer (Thermo Scientific) using the following  
650 gradient: 5%-35% solvent B in 120 min, 35% -45% solvent B in 10 min, followed by 45%-  
651 100% solvent B in 20 min. The full scan was acquired with a resolution of 45,000 (@  $m/z$   
652 200), a target value of  $3e6$  and a maximum ion time of 45 ms. Following each full MS  
653 scan, twenty data-dependent MS/MS spectra were acquired. The MS/MS spectra were  
654 collected with a resolution of 15,000 an AGC target of  $1e5$ , maximum ion time of 120ms,  
655 one microscan, 2 $m/z$  isolation window, fixed first mass of 150  $m/z$ , dynamic exclusion of  
656 30 sec, and Normalized Collision Energy (NCE) of 27. All acquired MS2 spectra were  
657 searched against a UniProt *M. tuberculosis* H37Rv database including common  
658 contaminant proteins using Sequest HT within Proteome Discoverer 1.4 (Thermo Fisher  
659 Scientific). The search parameters were as follows: precursor mass tolerance  $\pm 10$  ppm,  
660 fragment mass tolerance  $\pm 0.02$  Da, digestion parameters trypsin allowing two missed  
661 cleavages, fixed modification of carbamidomethyl on cysteine, variable modification of  
662 oxidation on methionine, and variable modification of deamidation on glutamine and  
663 asparagine and a 1% peptide and protein FDR searched against a decoy database. The  
664 results were filtered to only include proteins identified by at least two unique peptides.  
665 Fold change analysis was performed for the RUCTAP purifications using the ratios of PSMs  
666 in oxidized to the PSMs in the native affinity purified samples using the SAINT algorithm

667 (64). SAINT scores were used to calculate the false discovery rate (FDR); proteins whose  
668 SAINT score yielded an FDR of 5% or lower were considered statistically significant and  
669 are highlighted in Table S2.

670

671 **Measurement of *M. tuberculosis* susceptibility to oxidants.** *M. tuberculosis* was  
672 grown in 7H9c to an OD<sub>580</sub> of 0.5 at 37°C, centrifuged and resuspended in fresh 7H9c,  
673 and spun at 500 × g to remove clumps of bacteria. Supernatants were then diluted to an  
674 OD<sub>580</sub> of 0.025, transferred to 96-well plates, and incubated at 45°C for four hours to  
675 induce Ruc production. Afterwards, *M. tuberculosis* strains were subjected to oxidizing  
676 reagents and inoculated onto 7H11 agar as described in the legend for Fig. S3.

677

678 **Computational analyses.** Iterative sequence profile searches were performed to recover  
679 Ruc sequence homologs using the PSI-BLAST program (65). Searches were either run  
680 against the non-redundant (nr) protein database of the National Center for Biotechnology  
681 Information (NCBI), or a custom database of 7423 complete prokaryotic genomes  
682 extracted from the NCBI Refseq database (66). The latter was used for phyletic profile  
683 analyses (Table 2). Contextual information from prokaryotic gene neighborhoods was  
684 retrieved using a Perl script that extracts the upstream and downstream genes of a query  
685 gene from a GenBank genome file. This was followed by clustering of proteins using the  
686 BLASTCLUST program (<ftp://ftp.ncbi.nih.gov/blast/documents/blastclust.html>) to identify  
687 conserved gene-neighborhoods. Analysis and visualization of phyletic patterns was  
688 performed using the R language.

689

690 **Acknowledgments**

691 We thank C. Nathan and K. Burns-Huang for providing strains and technical advice. This  
692 work was supported by NIH grants AI088075 and AI144851 awarded to K.H.D. S.H.B  
693 was supported by NIH grant T32 AT007180. S.H.B. also received support from the Jan  
694 T. Vilcek Endowed Fellowship Fund. E.P.S. received support from AI150701 and  
695 AI069233. K.U. and U.J. thank the DFG Priority Program SPP 1710 (Schw823/3-2). L.M.I.  
696 and L.A. are supported by the intramural funds of the National Library of Medicine, NIH.  
697 The mass spectrometry experiments were in part supported by the NYU Grossman  
698 School of Medicine.

699

700 **Author contributions**

701 S.H.B., K.U., A.D., B.U., W.B., E.P.S., L.I., L. A., U.J. and K.H.D. designed research;  
702 S.H.B., K.U., A.D., W.B., L.M.I., and L.A. performed research; S.H.B, K.H.D., and L.A.  
703 wrote the manuscript.

704

705



706

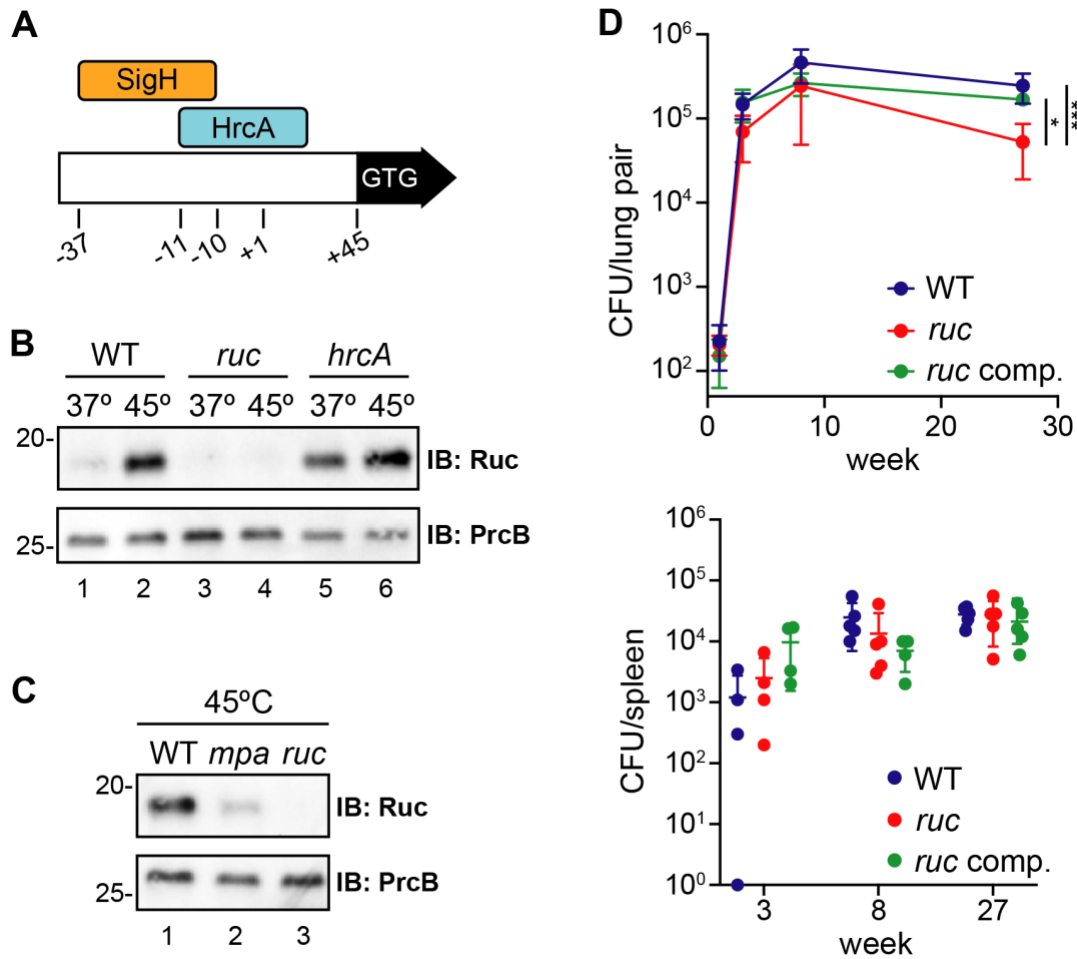

707 **Fig. 1. *M. tuberculosis* Ruc is a heat shock-inducible, HrcA- and Mpa-regulated**  
 708 **small protein. (A)** Illustration of the *ruc* control region in *M. tuberculosis*. The position of  
 709 the *ruc* transcriptional start site (+1), as well as the binding sites of sigma factor SigH and  
 710 repressor HrcA are shown relative to the +1 (24, 25). A second +1 was identified 19  
 711 nucleotides upstream of the +1 shown here (67). **(B)** WT (MHD1), *ruc* (MHD1384), and  
 712 *hrcA* (MHD1384) *M. tuberculosis* strains were incubated at 37°C or 45°C, and Ruc  
 713 abundance was assessed in bacterial lysates by immunoblot (IB). Immunoblotting for  
 714 PrcB was used as a loading control. **(C)** WT, *mpa* (MHD149), and *ruc* strains analyzed  
 715 as in panel (B). **(D)** Mice were infected with WT with empty vector (MHD1385), *ruc* with  
 716 empty vector (MHD1393), or *ruc* complemented with pMV306kan-*ruc* (MHD1394) *M.*  
 717 *tuberculosis* strains, and bacterial burden in the lungs (top panel) and spleen (bottom  
 718 panel) was determined at day 1 or at weeks 3, 8, and 27. Statistical significance was  
 719 determined using one-way ANOVA; \*\*\*,  $p < 0.001$ ; \*,  $p < 0.05$ . Significant differences in  
 720 lung bacterial burden are shown for 27 weeks after infection; all other time points were  
 721 determined to be not significant ( $p > 0.05$ ).  
 722

723

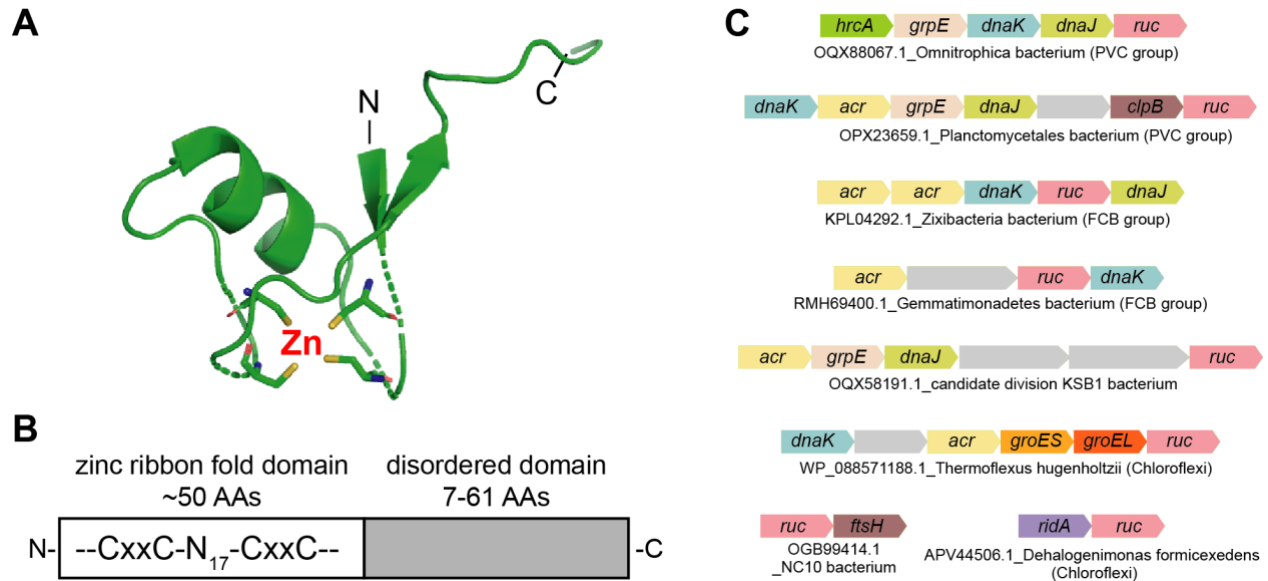

724

725

726

727

728

729

730

731

732

733

734

735

736

737

**Fig. 2. Ruc contains a putative zinc-binding domain with a disordered C-terminus, and co-occurs with proteostasis genes in diverse bacterial lineages. (A)** Predicted structure of the N-terminal region of *M. tuberculosis* Ruc (residues 5-48) based on Phyre2 predictive modeling (30). The four cysteines in Ruc are represented as sticks, with the thiol groups shown in yellow. The position of a predicted zinc ion is also shown. **(B)** Illustration of the conserved features of Ruc. x, unspecified amino acid; N<sub>17</sub>, region 17 residues in length. **(C)** Genetic loci containing *ruc* with neighboring genes encoding chaperones, proteases, or chaperone-associated transcriptional regulators. Representatives of the phyletic groups PVC (Planctomycetes, Verrucomicrobia, Chlamydiae) and FCB (Fibrobacteres, Chlorobi, Bacteroidetes), as well as members of Chloroflexi and unclassified phyla, are shown. Genes are represented by the NCBI GenBank database accession number of the *ruc* gene followed by the species name and bacterial clade in bracket (if known).

738

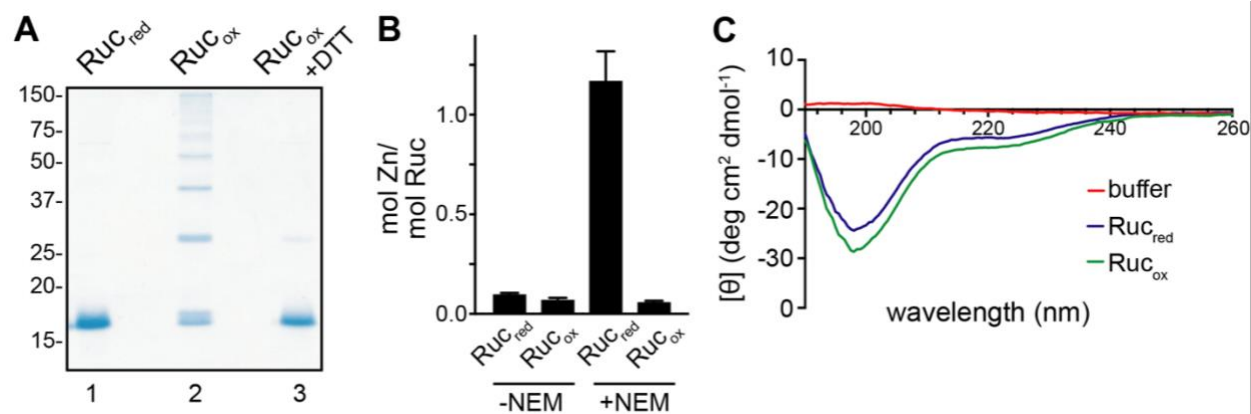

739 **Fig. 3. Ruc contains redox-active cysteines that coordinate a single zinc atom, and**  
740 **is an intrinsically disordered protein. (A)** Reduced Ruc ( $RuC_{red}$ ), oxidized Ruc ( $RuC_{ox}$ ),  
741 or  $RuC_{ox}$  treated with the thiol-reducing agent dithiothrietol (DTT) were separated on an  
742 SDS-PAGE gel and stained with Coomassie brilliant blue. **(B)** Zinc coordination by  $RuC_{red}$   
743 or  $RuC_{ox}$  was quantified in the absence or presence of N-ethylmaleimide (NEM), which  
744 modifies cysteines. Zinc concentrations were measured spectrophotometrically using the  
745 metal chelator 4-(2-pyridylazo)resorcinol (PAR) (see Materials and Methods for details).  
746 **(C)** Assessment of Ruc secondary structure using circular dichroism, with degrees of  
747 ellipticity  $[\theta]$  plotted by wavelength.

748

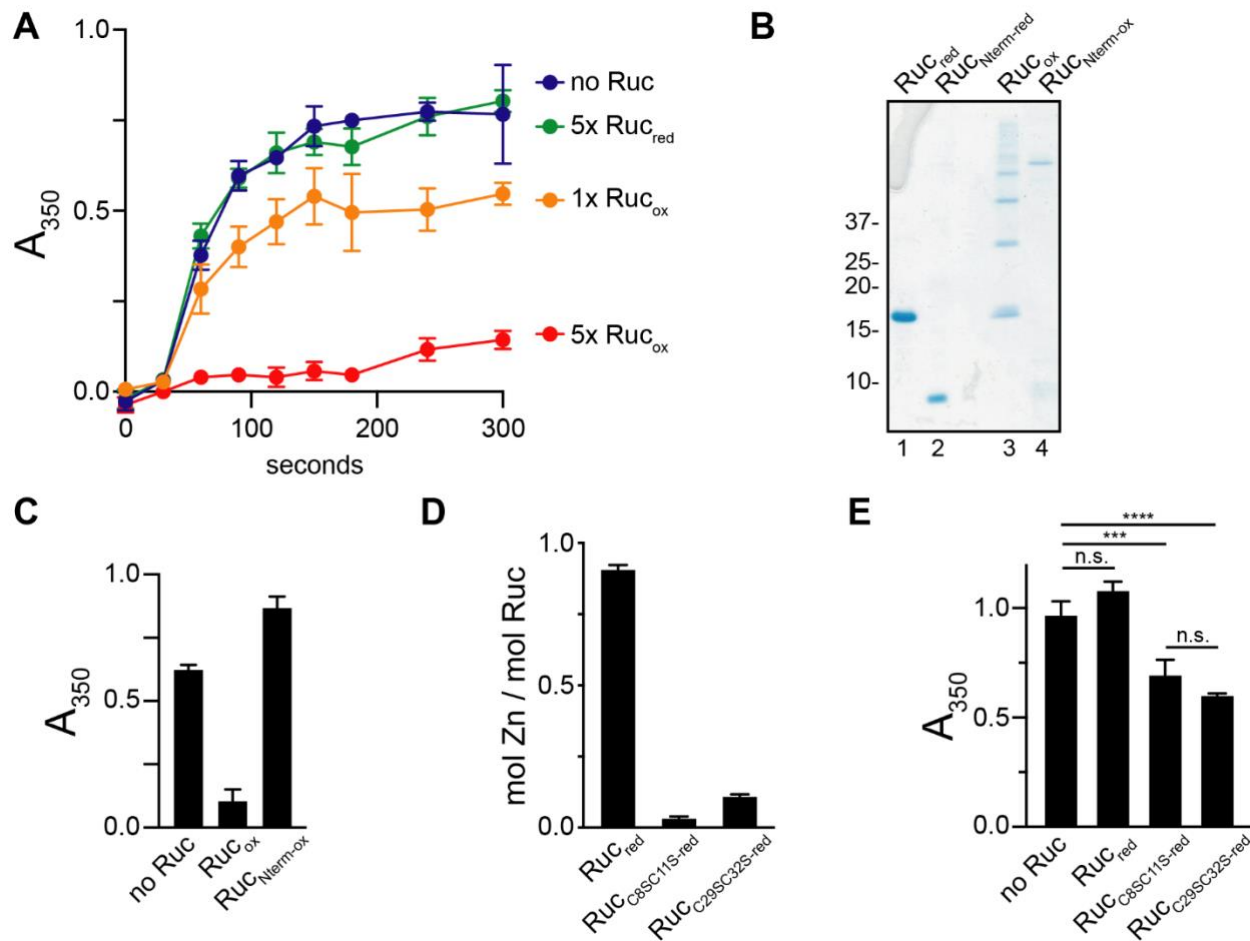

749 **Fig. 4. Oxidized Ruc inhibits protein aggregation.** (A) Aggregation of luciferase upon  
750 heat denaturation. Luciferase was incubated at 45°C either alone or in the presence of a  
751 five-fold molar excess (5x) of Ruc<sub>red</sub>, 5x Ruc<sub>ox</sub>, or an equimolar concentration (1x) of  
752 Ruc<sub>ox</sub>. Aggregation was assessed by absorbance at 350 nm (A<sub>350</sub>). The difference in  
753 aggregation between no Ruc and 1x Ruc<sub>ox</sub> or 5x Ruc<sub>ox</sub> conditions was statistically  
754 significant (paired *t*-test, *P* < 0.01), while no significant difference was obtained with  
755 Ruc<sub>red</sub>. (B) Ruc and Ruc<sub>Nterm</sub> (comprising residues 1-49), in either a reduced or oxidized  
756 state, were separated on a Coomassie-stained SDS-PAGE gel. (C) Aggregation of heat-  
757 denatured luciferase as in (A), except only the 300 second time point is shown. Native  
758 Ruc<sub>ox</sub> or Ruc<sub>Nterm-ox</sub> were incubated with luciferase in fivefold molar excess at 45°C as  
759 indicated. (D) Quantification of zinc in native Ruc and Ruc cysteine-to-serine variants, as  
760 described for Figure 3B. NEM was included in all reactions. (E) Luciferase aggregation  
761 assay as in (C) to assess the activity of reduced Ruc cysteine-to-serine variants.  
762 Statistical significance was determined using one-way ANOVA; \*\*\*\*, *P* < 0.0001; \*\*\*, *P* <  
763 0.001; n.s., not statistically significant (*P* > 0.05). All reactions were performed in triplicate.

764

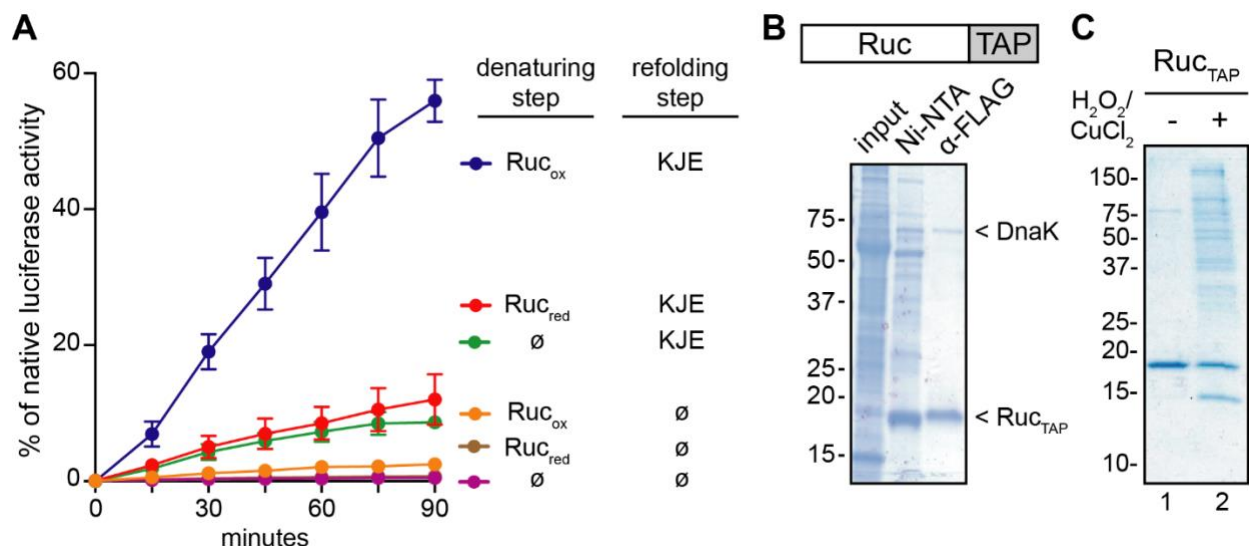

765

766 **Fig. 5. Ruc promotes protein folding by the *M. tuberculosis* Hsp70 system and**  
 767 **associates with many *M. tuberculosis* proteins. (A)** Luciferase was denatured at 45°C  
 768 in the presence of either Ruc<sub>red</sub>, Ruc<sub>ox</sub>, or a buffer control (∅). Reactions were then cooled  
 769 to 25°C and incubated either with DnaK, DnaJ2, and GrpE (KJE). Refolding of denatured  
 770 luciferase was determined by measuring luciferase activity at the indicated time points  
 771 following addition of KJE or buffer. As a control, native luciferase activity was measured  
 772 at each time point by incubating non-denatured luciferase in the same buffer for the same  
 773 duration (see Materials and Methods for a detailed protocol). Data shown are the result  
 774 of three independent experiments comparing each condition. **(B)** Ruc containing a C-  
 775 terminal hexahistidine-FLAG tandem affinity purification tag (Ruc<sub>TAP</sub>, illustrated above)  
 776 was purified from *M. tuberculosis* strain MHD1541. A two-step purification was performed  
 777 on soluble *M. tuberculosis* lysates (input) using Ni-NTA resin followed by FLAG antibody  
 778 gel (α-FLAG). The identity of DnaK was determined using mass spectrometry (see  
 779 Materials and Methods) and immunoblotting (see Figure S2A). **(C)** Ruc<sub>TAP</sub> was purified  
 780 from *M. tuberculosis* as in (B), except that input lysates were subjected to oxidation (H<sub>2</sub>O<sub>2</sub>  
 781 and CuCl<sub>2</sub> treatment) or no treatment prior to purification. The final α-FLAG-purified  
 782 material is shown. For (B) and (C), samples were separated on SDS-PAGE gels under  
 783 reducing conditions.

784

785

786

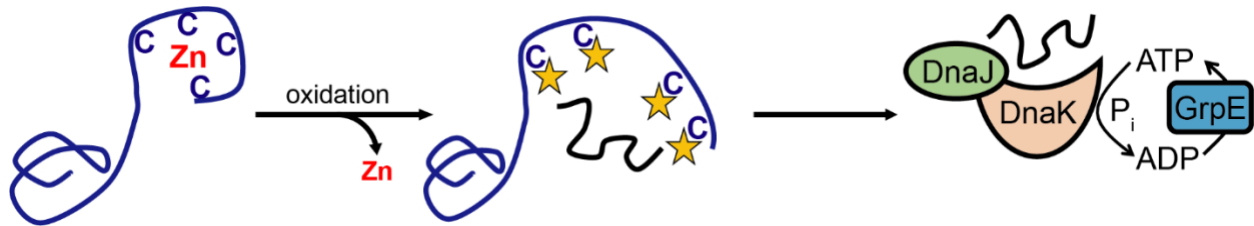

787

788

789

790

791

792

793

**Fig. 6. Model of Ruc chaperone activity in *M. tuberculosis*.** From left to right; under the steady-state reducing conditions of the cytoplasm, Ruc coordinates zinc and is inactive; upon oxidation of Ruc cysteines, zinc is displaced and Ruc binds to unfolded proteins; a Ruc client protein is transferred to the Hsp70 system for refolding into its native conformation.

794

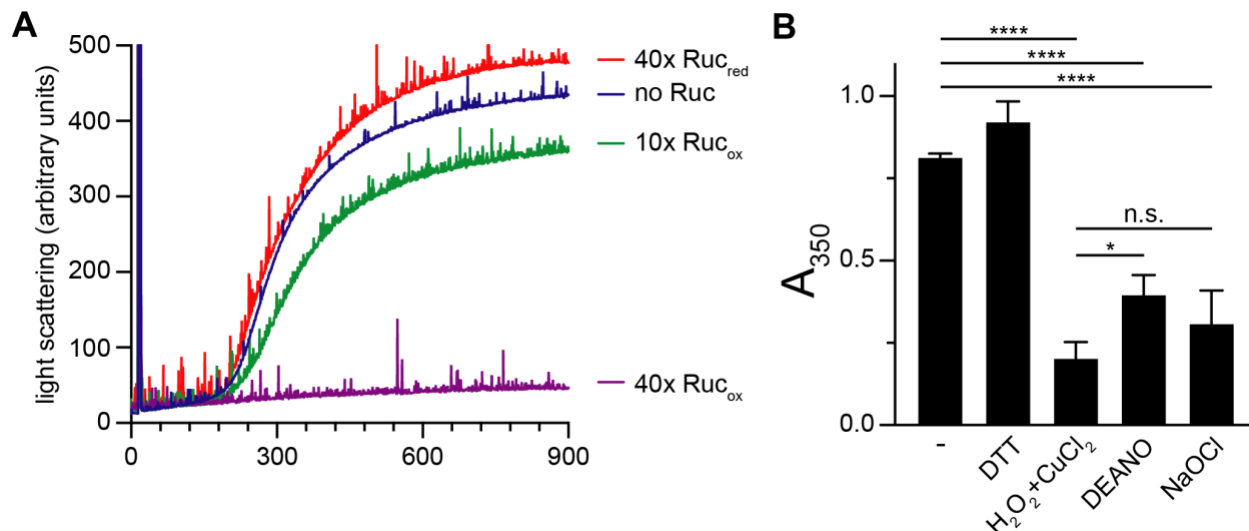

795 **Fig. S1. Ruc<sub>ox</sub> inhibits protein aggregation and is activated by multiple oxidants.**  
796 **(A)** Measurement of denatured luciferase aggregation using light scattering  
797 spectrophotometry. Luciferase was incubated alone, in the presence of a 40-fold (40x) or  
798 10-fold (10x) molar excess of Ruc<sub>ox</sub>, or a 40-fold molar excess of Ruc<sub>red</sub>. **(B)** Measurement  
799 of denatured luciferase aggregation using absorbance at 350 nm (A<sub>350</sub>). Luciferase was  
800 incubated at 45°C for 5 minutes either alone (-) or in the presence of Ruc pre-treated with  
801 2 mM DTT, 2 mM H<sub>2</sub>O<sub>2</sub> with 0.5 mM CuCl<sub>2</sub>, 2 mM diethylamine NONOate (DEANO, a  
802 nitric oxide donor), or 2 mM sodium hypochlorite (NaOCl). Data in (A) is representative of  
803 two independent experiments; (B) was performed using three replicates per condition.  
804 Statistical significance was determined using one-way ANOVA; \*\*\*\*,  $p < 0.0001$ ; \*,  $p <$   
805  $0.05$ ; n.s., not statistically significant ( $p > 0.05$ ).  
806

807

808

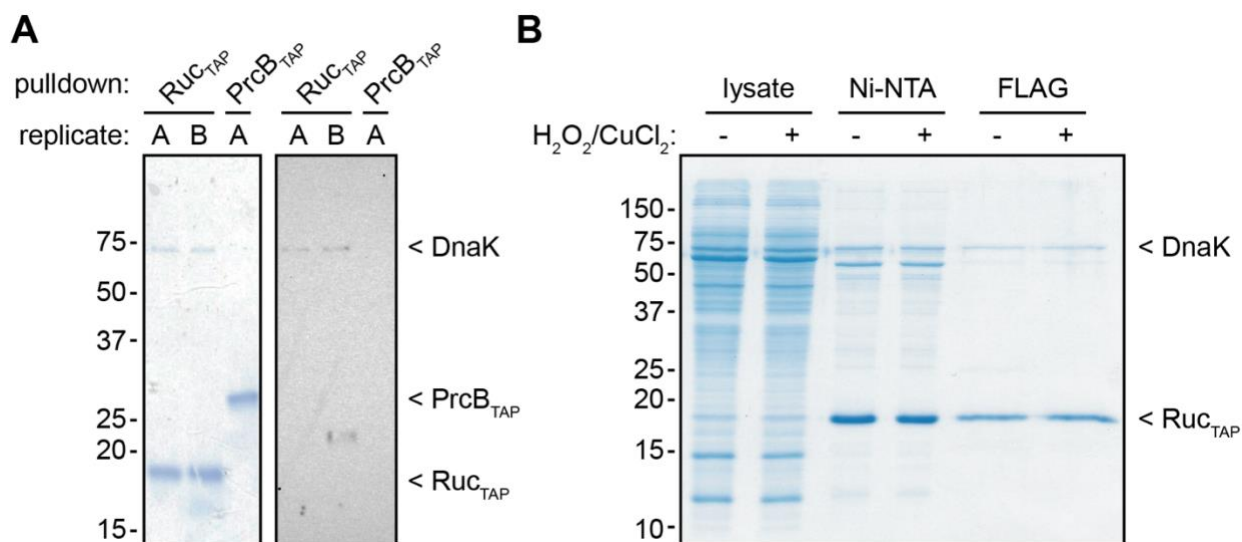

809

810 **Fig. S2. Ruc<sub>TAP</sub> co-purifies with DnaK, and subjecting *M. tuberculosis* to oxidation**  
811 **does not affect Ruc<sub>TAP</sub> purification. (A)** Ruc<sub>TAP</sub> or PrcB<sub>TAP</sub> (a control, TAP-tagged  
812 protein) purifications from *M. tuberculosis* were separated on an SDS-PAGE gel and  
813 either stained with Coomassie brilliant blue (left) or analyzed by immunoblotting with a  
814 monoclonal antibody against *M. tuberculosis* DnaK (right). **(B)** Ruc<sub>TAP</sub> was purified in two  
815 steps (Ni-NTA resin followed by  $\alpha$ -FLAG affinity gel) from *M. tuberculosis* cultures (strain  
816 MHD1541) that were either untreated or treated with a sublethal concentration of oxidants  
817 (0.625 mM H<sub>2</sub>O<sub>2</sub> with 16 nmol CuCl<sub>2</sub>) for 30 minutes at 45°C.  
818



819

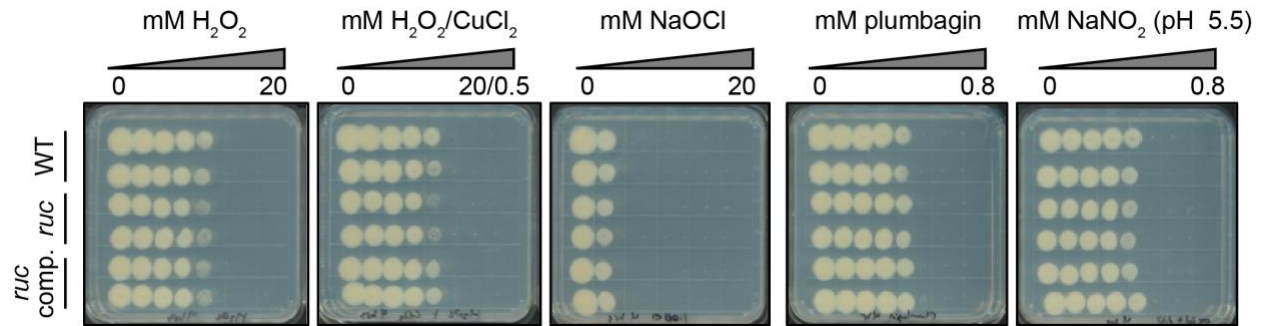

820 **Figure S3. WT and *ruc* mutant strains are equally sensitive to oxidants.** The  
821 approximate lethal dose of the indicated oxidizing agents (above) on *M. tuberculosis*  
822 strains (left; MHD1385, MHD1393, and MHD1394 are represented). A series of two-fold  
823 serial dilutions of each oxidant was added to *M. tuberculosis* at the final concentrations  
824 shown; cultures were incubated along with oxidants at 45°C for four hours. Afterwards,  
825 cultures were spot-plated onto solid agar media, and plates were incubated at 37°C for  
826 two weeks to assess surviving bacteria.

827 **Table 1. Strains, plasmids and primers used in this work.**828 ***M. tuberculosis* strains**

| Strain  | Relevant genotype or description                                               | Source or reference                            |
|---------|--------------------------------------------------------------------------------|------------------------------------------------|
| MHD1    | Wild-type H37Rv                                                                | American Type Culture Collection (ATCC) #25618 |
| MHD1383 | Hyg <sub>R</sub> ; $\Delta hrcA::hyg$                                          | (23)                                           |
| MHD1384 | Hyg <sub>R</sub> ; $\Delta ruc::hyg$ (deletion-disruption mutation of Rv0991c) | (23)                                           |
| MHD149  | Hyg <sub>R</sub> ; $\Delta mpa::hyg$                                           | (57)                                           |
| MHD1541 | Hyg <sub>R</sub> ; H37Rv, pOLYG- <i>ruc</i> -TAP                               | This study                                     |
| MHD1385 | Kan <sub>R</sub> ; H37Rv, pMV306kan                                            | This study                                     |
| MHD1393 | Kan <sub>R</sub> , Hyg <sub>R</sub> ; MHD1384, pMV306kan                       | This study                                     |
| MHD1394 | Kan <sub>R</sub> , Hyg <sub>R</sub> ; MHD1384, pMV306kan- <i>ruc</i>           | This study                                     |

829 ***E. coli* strains**

| Strain       | Relevant genotype or description                                                                                                                                                            | Source or reference |
|--------------|---------------------------------------------------------------------------------------------------------------------------------------------------------------------------------------------|---------------------|
| DH5 $\alpha$ | <i>supE44</i> $\Delta lacU169$ ( $\phi 80 lacZ\Delta M15$ ) <i>hsdR17 recA1 endA1 gyrA96 thi-1 relA1</i> (Nal <sub>R</sub> )                                                                | Gibco               |
| ER2566       | F- $\lambda$ - <i>fhuA2</i> [ <i>lon</i> ] <i>ompT lacZ::T7 genel gal sulA11</i> $\Delta(mcrC-mrr)14::IS10$ <i>R(mcr-73::miniTn10)2 R(zgb-210::Tn10)1 (tetS) endA1 [dcm]</i>                | (68)                |
| BL21 (DE3)   | F- <i>ompT gal dcm lon hsdS<math>\beta</math>(r<sub>B</sub>-m<sub>B</sub>-)</i> $\lambda$ (DE3 [ <i>lacI lacUV5-T7p07 ind1 sam7 nin5</i> ] [ <i>malB+</i> ] <sub>K-12</sub> ( $\lambda$ S)) | New England Biolabs |

830 **Plasmids**

| Plasmid   | Relevant genotype or description                                                     | Source or reference |
|-----------|--------------------------------------------------------------------------------------|---------------------|
| pET24b(+) | Kan <sub>R</sub> ; for inducible production of recombinant protein in <i>E. coli</i> | Novagen             |

|                                         |                                                                                                                                                                                                                       |            |
|-----------------------------------------|-----------------------------------------------------------------------------------------------------------------------------------------------------------------------------------------------------------------------|------------|
| pET24b(+)-Rv0991c-his6                  | Kan <sub>R</sub> ; for production of recombinant Ruc with C-terminal His <sub>6</sub> (Ruc-His <sub>6</sub> )                                                                                                         | This study |
| pAJD107                                 | Amp <sub>R</sub> ; contains multiple restriction sites for cloning                                                                                                                                                    | (69)       |
| pAJD107-Rv0991c                         | Amp <sub>R</sub> ; for making the <i>ruc</i> expression vector                                                                                                                                                        | This study |
| pAJD107-Rv0991c-C8SC11S                 | Amp <sub>R</sub> ; for cloning HisSUMO- <i>ruc</i> -C8SC11S expression vector                                                                                                                                         | This study |
| pET24b(+)-Rv0991c                       | Kan <sub>R</sub> ; for production of recombinant, native Ruc                                                                                                                                                          | This study |
| pET24b(+)-Ruc-C8,11S                    | Kan <sub>R</sub> ; for cloning HisSUMO- <i>ruc</i> -C8SC11S expression vector                                                                                                                                         | This study |
| pEcTL02                                 | Amp <sub>R</sub> ; for purification of <i>M. tuberculosis</i> ClpB with N-terminal His <sub>6</sub> -SUMO from <i>E. coli</i>                                                                                         | (11)       |
| pEcTL04                                 | Amp <sub>R</sub> ; for purification of <i>M. tuberculosis</i> DnaJ2 with N-terminal His <sub>6</sub> -SUMO from <i>E. coli</i>                                                                                        | (11)       |
| pEcTL05                                 | Amp <sub>R</sub> ; for purification of <i>M. tuberculosis</i> GrpE with N-terminal His <sub>6</sub> -SUMO from <i>E. coli</i>                                                                                         | (11)       |
| pEcTL06                                 | Amp <sub>R</sub> ; for purification of <i>M. tuberculosis</i> DnaK with N-terminal His <sub>6</sub> -SUMO from <i>E. coli</i>                                                                                         | (11)       |
| pET24b(+)-HisSUMO- <i>ruc</i>           | Kan <sub>R</sub> ; for purification of <i>M. tuberculosis</i> Ruc with N-terminal His <sub>6</sub> -SUMO from <i>E. coli</i>                                                                                          | This study |
| pET24b(+)-HisSUMO- <i>ruc</i> -Nterm    | Kan <sub>R</sub> ; for purification of <i>M. tuberculosis</i> Ruc <sub>Nterm</sub> (amino acids 1 through 49) with N-terminal His <sub>6</sub> -SUMO from <i>E. coli</i>                                              | This study |
| pET24b(+)-HisSUMO- <i>ruc</i> -C8SC11S  | Kan <sub>R</sub> ; for purification of <i>M. tuberculosis</i> Ruc <sub>C8S,C11S</sub> (containing cysteine to serine substitutions in residues 8 and 11) with N-terminal His <sub>6</sub> -SUMO from <i>E. coli</i>   | This study |
| pET24b(+)-HisSUMO- <i>ruc</i> -C29SC32S | Kan <sub>R</sub> ; for purification of <i>M. tuberculosis</i> Ruc <sub>C29S,C32S</sub> (containing cysteine to serine substitutions in residues 29 and 32) with N-terminal His <sub>6</sub> -SUMO from <i>E. coli</i> | This study |
| pHYRS52                                 | Amp <sub>R</sub> ; for purification of SUMO protease ( <i>S. cerevisiae</i> Ulp1, amino acids 403-621) with N-terminal His <sub>6</sub> from <i>E. coli</i>                                                           | Addgene    |

|                   |                                                                                                                                            |            |
|-------------------|--------------------------------------------------------------------------------------------------------------------------------------------|------------|
| pOLYG             | Hyg <sup>R</sup> ; for overproduction of proteins in <i>M. tuberculosis</i>                                                                | (70)       |
| pOLYG-Rv0991c-TAP | Hyg <sup>R</sup> ; for purification of Ruc with C-terminal hexahistidine-FLAG tandem affinity purification tag from <i>M. tuberculosis</i> | This study |
| pMV306kan         | Kan <sup>R</sup> ; for integration into the L5 <i>attB</i> site of the <i>M. tuberculosis</i> chromosome                                   | (71)       |
| pMV306kan-Rv0991c | Kan <sup>R</sup> ; <i>ruc</i> complementation plasmid                                                                                      | This study |

### 831 Primers

| Primer name            | Primer sequence                                                                        |
|------------------------|----------------------------------------------------------------------------------------|
| NdeI-Rv0991c-F         | gatcCATATGccaacctacagctacgagtgacc                                                      |
| HindIII-Rv0991c-R      | gtagAAGCTTgacggccgcgccggcg                                                             |
| HindIII-Rv0991c-F      | gtagAAGCTTtcgtctagtcgcggtggtgcg                                                        |
| XbaI-Rv0991c-R         | ttatTCTAGAtcagacggccgcgccggcg                                                          |
| XbaI-Rv0991c-TAP-R     | gatcTCTAGAtcagtgggtggtggtggtgctcgagtgcggccgccttatcgctcatcctgtaatcgacggccgcgcgccggttgga |
| BglII-Rv0991c-R        | tagacAGATCTtcagacggccgcgccggcggttg                                                     |
| SUMO-Ruc-soeR          | ctcgtagctgtaggtggcaccacccaatctgttctctgtgagcctc                                         |
| SUMO-Ruc-soeF          | gaggctcacagagaacagattggtggggtccaacctacagctacgag                                        |
| Ruc-KpnI-R             | tataGGTACctcagacggccgcgccggcggttg                                                      |
| RucNterm-KpnI-R        | tataGGTACctcagccttgaacaccacgccgaccgc                                                   |
| NdeI-Rv0991c-C8SC11S-F | GCGCCATATGCCAACCTACAGCTACGAGAGCACCCAGAGCGCCAACCGCTTCGATGTTGTG                          |
| Rv0991c-C29SC32S-F     | CCGACGATGCGCTGACCACGAGCGAGCGGAGTTCTGGCCGGCTGCGCAAGCTGTTCTC                             |
| Rv0991c-C29SC32S-R     | GAACAGCTTGCGCAGCCGGCCAGAACTCCGCTCGCTCGTGGTCAGCGCATCGTCTCG                              |

|         |                     |
|---------|---------------------|
| T7-F    | taatcgactcactataggg |
| T7-term | GCTAGTTATTGCTCAGCGG |

832

833 **Table 2. Occurance of *ruc* in bacterial and archaeal phyla.**  
834

| <b>Bacterial phylum (number of genomes)</b> | <b>% genomes with <i>ruc</i></b> |
|---------------------------------------------|----------------------------------|
| gammaproteobacteria (923)                   | 26.65                            |
| betaproteobacteria (333)                    | 82.88                            |
| zetaproteobacteria (5)                      | 80                               |
| alphaproteobacteria (469)                   | 17.27                            |
| deltaproteobacteria (86)                    | 86.05                            |
| proteobacteria (43)                         | 74.42                            |
| thermodesulfobacteria (4)                   | 100                              |
| spirochaetes (70)                           | 48.57                            |
| defferibacteres (4)                         | 100                              |
| chrysiogenetes (1)                          | 100                              |
| nitrospirae (73)                            | 86.3                             |
| acidobacteria (9)                           | 100                              |
| elusimicrobia (3)                           | 33.33                            |
| verrucomicrobia (74)                        | 60.81                            |
| chlamydiae (43)                             | 6.98                             |
| planctomycetes (18)                         | 100                              |
| bacteroidetes (263)                         | 1.9                              |
| chlorobi (263)                              | 5.7                              |
| fibrobacteres (2)                           | 0                                |
| gemmatimonadetes (3)                        | 100                              |
| ignavibacteriae (2)                         | 100                              |
| aquificae (15)                              | 20                               |
| dictyoglomi (2)                             | 100                              |
| thermotogae (29)                            | 100                              |
| deinococcus-thermus (26)                    | 100                              |
| synergistetes (5)                           | 0                                |
| fusobacteria (16)                           | 0                                |
| thermobaculum (1)                           | 100                              |
| actinobacteria (497)                        | 73.84                            |
| chloroflexi (22)                            | 100                              |
| armatimonadetes (15)                        | 73.33                            |
| tenericutes (124)                           | 0                                |
| firmicutes (772)                            | 8.94                             |
| cyanobacteria (127)                         | 13.39                            |
| calditrichaeota (2)                         | 100                              |
| unclassified bacteria (2565)                | 11.89                            |
| <b>Archaeal phylum (number of genomes)</b>  | <b>% genomes with <i>Ruc</i></b> |

|                      |      |
|----------------------|------|
| crenarchaeota (61)   | 1.64 |
| eueryarchaeota (187) | 6.42 |
| archaea (31)         | 3.23 |

835

836 **Table S1. ICP-MS analysis of Ruc metal binding.**

837 Excel spreadsheet in separate document



838 **Table S2. *M. tuberculosis* proteins that co-purified with Ruc<sub>TAP</sub>.**

839 Excel spreadsheet in separate document

840

## 841 BIBLIOGRAPHY

- 842
- 843 1. **Mayer MP, Gierasch LM.** 2019. Recent advances in the structural and  
844 mechanistic aspects of Hsp70 molecular chaperones. *J Biol Chem* **294**:2085-  
845 2097.
- 846 2. **Laufen T, Mayer MP, Beisel C, Klostermeier D, Mogk A, Reinstein J, Bukau**  
847 **B.** 1999. Mechanism of regulation of Hsp70 chaperones by DnaJ cochaperones.  
848 *Proc. Nat. Acad. Sci. USA.* **96**:5452.
- 849 3. **Liberek K, Skowrya D, Zylicz M, Johnson C, Georgopoulos C.** 1991. The  
850 *Escherichia coli* DnaK chaperone, the 70-kDa heat shock protein eukaryotic  
851 equivalent, changes conformation upon ATP hydrolysis, thus triggering its  
852 dissociation from a bound target protein. *J Biol Chem* **266**:14491-14496.
- 853 4. **Harrison CJ, Hayer-Hartl M, Di Liberto M, Hartl F, Kuriyan J.** 1997. Crystal  
854 structure of the nucleotide exchange factor GrpE bound to the ATPase domain of  
855 the molecular chaperone DnaK. *Science* **276**:431-435.
- 856 5. **Veinger L, Diamant S, Buchner J, Goloubinoff P.** 1998. The Small Heat-shock  
857 Protein IbpB from *Escherichia coli* Stabilizes Stress-denatured Proteins for  
858 Subsequent Refolding by a Multichaperone Network. *J Biol Chem* **273**:11032-  
859 11037.
- 860 6. **Hoffmann JH, Linke K, Graf PCF, Lilie H, Jakob U.** 2004. Identification of a  
861 redox-regulated chaperone network. *EMBO J* **23**:160-168.
- 862 7. **Fernández-Fernández MR, Gragera M, Ochoa-Ibarrola L, Quintana-Gallardo**  
863 **L, Valpuesta JM.** 2017. Hsp70 – a master regulator in protein degradation.  
864 *FEBS Letters* **591**:2648-2660.
- 865 8. **Zolkiewski M.** 1999. ClpB Cooperates with DnaK, DnaJ, and GrpE in  
866 Suppressing Protein Aggregation: A Novel Multi-Chaperone System from  
867 *Escherichia coli*. *J Biol Chem* **274**:28083-28086.
- 868 9. **Goloubinoff P, Mogk A, Zvi AP, Tomoyasu T, Bukau B.** 1999. Sequential  
869 mechanism of solubilization and refolding of stable protein aggregates by a  
870 bichaperone network. *Proc. Nat. Acad. Sci. USA.* **96**:13732-13737.
- 871 10. **Weibezahn J, Tessarz P, Schlieker C, Zahn R, Maglica Z, Lee S, Zentgraf H,**  
872 **Weber-Ban EU, Dougan DA, Tsai FTF, Mogk A, Bukau B.** 2004.  
873 Thermotolerance Requires Refolding of Aggregated Proteins by Substrate  
874 Translocation through the Central Pore of ClpB. *Cell* **119**:653-665.
- 875 11. **Lupoli TJ, Fay A, Adura C, Glickman MS, Nathan CF.** 2016. Reconstitution of  
876 a *Mycobacterium tuberculosis* proteostasis network highlights essential cofactor  
877 interactions with chaperone DnaK. *Proc Natl Acad Sci U S A* **113**:7947-7956.
- 878 12. **Haslbeck M, Weinkauff S, Buchner J.** 2018. Small heat shock proteins:  
879 Simplicity meets complexity. *J Biol Chem* **294**:2121-2132.
- 880 13. **Ehrnsperger M, Gräber S, Gaestel M, Buchner J.** 1997. Binding of non-native  
881 protein to Hsp25 during heat shock creates a reservoir of folding intermediates  
882 for reactivation. *EMBO J* **16**:221-229.
- 883 14. **Żwirowski S, Kłosowska A, Obuchowski I, Nillegoda NB, Piróg A,**  
884 **Ziętkiewicz S, Bukau B, Mogk A, Liberek K.** 2017. Hsp70 displaces small heat  
885 shock proteins from aggregates to initiate protein refolding. *EMBO J* **36**:783-796.

- 886 15. **Jakob U, Muse W, Eser M, Bardwell JCA.** 1999. Chaperone Activity with a  
887 Redox Switch. *Cell* **96**:341-352.
- 888 16. **Graf PCF, Martinez-Yamout M, VanHaerents S, Lilie H, Dyson HJ, Jakob U.**  
889 2004. Activation of the Redox-regulated Chaperone Hsp33 by Domain Unfolding.  
890 *J Biol Chem* **279**:20529-20538.
- 891 17. **Voth W, Schick M, Gates S, Li S, Vilardi F, Gostimskaya I, Southworth**  
892 **Daniel R, Schwappach B, Jakob U.** 2014. The Protein Targeting Factor Get3  
893 Functions as ATP-Independent Chaperone under Oxidative Stress Conditions.  
894 *Mol. Cell* **56**:116-127.
- 895 18. **Graumann J, Lilie H, Tang X, Tucker KA, Hoffmann JH, Vijayalakshmi J,**  
896 **Saper M, Bardwell JCA, Jakob U.** 2001. Activation of the Redox-Regulated  
897 Molecular Chaperone Hsp33—A Two-Step Mechanism. *Structure* **9**:377-387.
- 898 19. **Winter J, Linke K, Jatzek A, Jakob U.** 2005. Severe Oxidative Stress Causes  
899 Inactivation of DnaK and Activation of the Redox-Regulated Chaperone Hsp33.  
900 *Mol Cell* **17**:381-392.
- 901 20. **Müller A, Langklotz S, Lupilova N, Kuhlmann K, Bandow JE, Leichert LIO.**  
902 2014. Activation of RidA chaperone function by N-chlorination. *Nat Comm*  
903 **5**:5804.
- 904 21. **Voth W, Jakob U.** 2017. Stress-Activated Chaperones: A First Line of Defense.  
905 *Trends Biochem. Sci.* **42**:899-913.
- 906 22. 2019. Global tuberculosis report 2019. World Health Organization, Geneva.
- 907 23. **Becker SH, Jastrab JB, Dhabaria A, Chaton CT, Rush JS, Korotkov KV,**  
908 **Ueberheide B, Darwin KH.** 2019. The *Mycobacterium tuberculosis* Pup-  
909 proteasome system regulates nitrate metabolism through an essential protein  
910 quality control pathway. *Proc Natl Acad Sci U S A* **116**:3202-3210.
- 911 24. **Stewart GR, Wernisch L, Stabler R, Mangan JA, Hinds J, Laing KG, Young**  
912 **DB, Butcher PD.** 2002. Dissection of the heat-shock response in *Mycobacterium*  
913 *tuberculosis* using mutants and microarrays. *Microbiology* **148**:3129-3138.
- 914 25. **Sharp JD, Singh AK, Park ST, Lyubetskaya A, Peterson MW, Gomes AL,**  
915 **Potluri LP, Raman S, Galagan JE, Husson RN.** 2016. Comprehensive  
916 Definition of the SigH Regulon of *Mycobacterium tuberculosis* Reveals  
917 Transcriptional Control of Diverse Stress Responses. *PLoS One* **11**:e0152145.
- 918 26. **Vaubourgeix J, Lin G, Dhar N, Chenouard N, Jiang X, Botella H, Lupoli T,**  
919 **Mariani O, Yang G, Ouerfelli O, Unser M, Schnappinger D, McKinney J,**  
920 **Nathan C.** 2015. Stressed mycobacteria use the chaperone ClpB to sequester  
921 irreversibly oxidized proteins asymmetrically within and between cells. *Cell Host*  
922 *Microbe* **17**:178-190.
- 923 27. **Stewart GR, Newton SM, Wilkinson KA, Humphreys IR, Murphy HN,**  
924 **Robertson BD, Wilkinson RJ, Young DB.** 2005. The stress-responsive  
925 chaperone alpha-crystallin 2 is required for pathogenesis of *Mycobacterium*  
926 *tuberculosis*. *Mol Microbiol* **55**:1127-1137.
- 927 28. **Stewart GR, Snewin VA, Walzl G, Hussell T, Tormay P, O'Gaora P, Goyal M,**  
928 **Betts J, Brown IN, Young DB.** 2001. Overexpression of heat-shock proteins  
929 reduces survival of *Mycobacterium tuberculosis* in the chronic phase of infection.  
930 *Nat Med* **7**:732-737.

- 931 29. **Kapopoulou A, Lew JM, Cole ST.** 2011. The MycoBrowser portal: a  
932 comprehensive and manually annotated resource for mycobacterial genomes.  
933 *Tuberculosis* **91**:8-13.
- 934 30. **Kelley LA, Mezulis S, Yates CM, Wass MN, Sternberg MJE.** 2015. The Phyre2  
935 web portal for protein modeling, prediction and analysis. *Nat Protocols* **10**:845.
- 936 31. **Krishna SS, Majumdar I, Grishin NV.** 2003. Structural classification of zinc  
937 fingers: SURVEY AND SUMMARY. *Nucleic Acids Res* **31**:532-550.
- 938 32. **Jakob U, Eser M, Bardwell JCA.** 2000. Redox Switch of Hsp33 Has a Novel  
939 Zinc-binding Motif. *J Biol Chem* **275**:38302-38310.
- 940 33. **Park OK, Bauerle R.** 1999. Metal-catalyzed oxidation of phenylalanine-sensitive  
941 3-deoxy-D-arabino-heptulosonate-7-phosphate synthase from *Escherichia coli*:  
942 inactivation and destabilization by oxidation of active-site cysteines. *J Bacteriol*  
943 **181**:1636-1642.
- 944 34. **Pollard FH, Hanson P, Geary WJ.** 1959. 4-(2-Pyridylazo)-resorcinol as a  
945 possible analytical reagent for the colorimetric estimation of cobalt, lead, and  
946 uranium. *Anal Chimica Acta* **20**:26-31.
- 947 35. **Kelly SM, Jess TJ, Price NC.** 2005. How to study proteins by circular dichroism.  
948 *Biochimica et Biophysica Acta - Proteins and Proteomics* **1751**:119-139.
- 949 36. **Greenfield NJ.** 2006. Using circular dichroism spectra to estimate protein  
950 secondary structure. *Nat Protocols* **1**:2876-2890.
- 951 37. **Oh HJ, Chen X, Subject JR.** 1997. hsp110 Protects Heat-denatured Proteins  
952 and Confers Cellular Thermoresistance. *J Biol Chem* **272**:31636-31640.
- 953 38. **Buchner J, Grallert H, Jakob U.** 1998. Analysis of chaperone function using  
954 citrate synthase as nonnative substrate protein. *Methods Enzymol* **290**:323-338.
- 955 39. **Groiti B, Horowitz S, Makepeace KAT, Petrotchenko EV, Borchers CH,  
956 Reichmann D, Bardwell JCA, Jakob U.** 2016. Protein unfolding as a switch  
957 from self-recognition to high-affinity client binding. *Nat Comm* **7**:10357.
- 958 40. **Reichmann D, Xu Y, Cremers Claudia M, Ilbert M, Mittelman R, Fitzgerald  
959 Michael C, Jakob U.** 2012. Order out of Disorder: Working Cycle of an  
960 Intrinsically Unfolded Chaperone. *Cell* **148**:947-957.
- 961 41. **Mogk A, Deuerling E, Vorderwülbecke S, Vierling E, Bukau B.** 2003. Small  
962 heat shock proteins, ClpB and the DnaK system form a functional triade in  
963 reversing protein aggregation. *Mol Microbiol* **50**:585-595.
- 964 42. **Nathan C, Shiloh MU.** 2000. Reactive oxygen and nitrogen intermediates in the  
965 relationship between mammalian hosts and microbial pathogens. *Proc Natl Acad  
966 Sci U S A* **97**:8841-8848.
- 967 43. **Jackson SH, Gallin JI, Holland SM.** 1995. The p47phox mouse knock-out  
968 model of chronic granulomatous disease. *J Exp Med* **182**:751.
- 969 44. **Pollock JD, Williams DA, Gifford MAC, Li LL, Du X, Fisherman J, Orkin SH,  
970 Doerschuk CM, Dinauer MC.** 1995. Mouse model of X-linked chronic  
971 granulomatous disease, an inherited defect in phagocyte superoxide production.  
972 *Nat Genetics* **9**:202-209.
- 973 45. **MacMicking JD, North RJ, LaCourse R, Mudgett JS, Shah SK, Nathan CF.**  
974 1997. Identification of nitric oxide synthase as a protective locus against  
975 tuberculosis. *Proc Natl Acad Sci U S A* **94**:5243-5248.

- 976 46. **Aratani Y, Koyama H, Nyui S-i, Suzuki K, Kura F, Maeda N.** 1999. Severe  
977 Impairment in Early Host Defense against *Candida albicans* in Mice Deficient in  
978 Myeloperoxidase. *Infect Immun* **67**:1828.
- 979 47. **Deffert C, Cachat J, Krause K-H.** 2014. Phagocyte NADPH oxidase, chronic  
980 granulomatous disease and mycobacterial infections. *Cell Microbiol* **16**:1168-  
981 1178.
- 982 48. **Shimada H, Yamaoka Y, Morita R, Mizuno T, Gotoh K, Higuchi T, Shiraishi  
983 T, Imamura Y.** 2012. Possible mechanism of superoxide formation through redox  
984 cycling of plumbagin in pig heart. *Toxicol in Vitro* **26**:252-257.
- 985 49. **Stuehr DJ, Nathan CF.** 1989. Nitric oxide. A macrophage product responsible  
986 for cytostasis and respiratory inhibition in tumor target cells. *J Exp Med*  
987 **169**:1543-1555.
- 988 50. **Lu J, Holmgren A.** 2014. The thioredoxin antioxidant system. *Free Radical  
989 Biology and Medicine* **66**:75-87.
- 990 51. **Sassetti CM, Rubin EJ.** 2003. Genetic requirements for mycobacterial survival  
991 during infection. *Proc Natl Acad Sci U S A* **100**:12989.
- 992 52. **Abomoelak B, Marcus SA, Ward SK, Karakousis PC, Steinberg H, Talaat  
993 AM.** 2011. Characterization of a novel heat shock protein (Hsp22.5) involved in  
994 the pathogenesis of *Mycobacterium tuberculosis*. *J Bacteriol* **193**:3497-3505.
- 995 53. **Szklarczyk D, Gable AL, Lyon D, Junge A, Wyder S, Huerta-Cepas J,  
996 Simonovic M, Doncheva NT, Morris JH, Bork P, Jensen LJ, Mering  
997 Christian v.** 2018. STRING v11: protein–protein association networks with  
998 increased coverage, supporting functional discovery in genome-wide  
999 experimental datasets. *Nuc Acids Res* **47**:D607-D613.
- 1000 54. **Zhang H, Yang J, Wu S, Gong W, Chen C, Perrett S.** 2016. Glutathionylation of  
1001 the Bacterial Hsp70 Chaperone DnaK Provides a Link between Oxidative Stress  
1002 and the Heat Shock Response. *J Biol Chem* **291**:6967-6981.
- 1003 55. **Ho SN, Hunt HD, Horton RM, Pullen JK, Pease LR.** 1989. Site-directed  
1004 mutagenesis by overlap extension using the polymerase chain reaction. *Gene*  
1005 **77**:51-59.
- 1006 56. **Hatfull GF, Jacobs WR.** 2000. Molecular Genetics of Mycobacteria. ASM Press,  
1007 Washington, D.C.
- 1008 57. **Samanovic MI, Tu S, Novak O, Iyer LM, McAllister FE, Aravind L, Gygi SP,  
1009 Hubbard SR, Strnad M, Darwin KH.** 2015. Proteasomal control of cytokinin  
1010 synthesis protects *Mycobacterium tuberculosis* against nitric oxide. *Mol Cell*  
1011 **57**:984-994.
- 1012 58. **Winter J, Ilbert M, Graf PCF, Ozcelik D, Jakob U.** 2008. Bleach activates a  
1013 redox-regulated chaperone by oxidative protein unfolding. *Cell* **135**:691-701.
- 1014 59. **Hunt JB, Neece SH, Ginsburg A.** 1985. The use of 4-(2-pyridylazo)resorcinol in  
1015 studies of zinc release from *Escherichia coli* aspartate transcarbamoylase. *Anal  
1016 Biochem* **146**:150-157.
- 1017 60. **Kurganov BI.** 2002. Kinetics of Protein Aggregation. Quantitative Estimation of  
1018 the Chaperone-Like Activity in Test-Systems Based on Suppression of Protein  
1019 Aggregation. *Biochemistry* **67**:409-422.

- 1020 61. **Pellaud J, Schote U, Arvinte T, Seelig J.** 1999. Conformation and Self-  
1021 association of Human Recombinant Transforming Growth Factor- $\beta$ 3 in Aqueous  
1022 Solutions. *J Biol Chem* **274**:7699-7704.
- 1023 62. **Jastrab JB, Wang T, Murphy JP, Bai L, Hu K, Merx R, Huang J, Chatterjee**  
1024 **C, Ovaas H, Gygi SP, Li H, Darwin KH.** 2015. An adenosine triphosphate-  
1025 independent proteasome activator contributes to the virulence of Mycobacterium  
1026 tuberculosis. *Proc Natl Acad Sci U S A* **112**:E1763-1772.
- 1027 63. **Lignitto L, LeBoeuf SE, Homer H, Jiang S, Askenazi M, Karakousi TR, Pass**  
1028 **HI, Bhutkar AJ, Tsiganos A, Ueberheide B, Sayin VI, Papagiannakopoulos T,**  
1029 **Pagano M.** 2019. Nrf2 Activation Promotes Lung Cancer Metastasis by Inhibiting  
1030 the Degradation of Bach1. *Cell* **178**:316-329.e318.
- 1031 64. **Choi H, Larsen B, Lin Z-Y, Breikreutz A, Mellacheruvu D, Fermin D, Qin ZS,**  
1032 **Tyers M, Gingras A-C, Nesvizhskii AI.** 2011. SAINT: probabilistic scoring of  
1033 affinity purification–mass spectrometry data. *Nat Methods* **8**:70-73.
- 1034 65. **Schäffer AA, Aravind L, Madden TL, Shavirin S, Spouge JL, Wolf YI, Koonin**  
1035 **EV, Altschul SF.** 2001. Improving the accuracy of PSI-BLAST protein database  
1036 searches with composition-based statistics and other refinements. *Nuc Acids*  
1037 *Res* **29**:2994-3005.
- 1038 66. **Tatusova T, DiCuccio M, Badretdin A, Chetvernin V, Nawrocki EP,**  
1039 **Zaslavsky L, Lomsadze A, Pruitt KD, Borodovsky M, Ostell J.** 2016. NCBI  
1040 prokaryotic genome annotation pipeline. *Nuc Acids Res* **44**:6614-6624.
- 1041 67. **Shell SS, Wang J, Lapierre P, Mir M, Chase MR, Pyle MM, Gawande R,**  
1042 **Ahmad R, Sarracino DA, Ioerger TR, Fortune SM, Derbyshire KM, Wade JT,**  
1043 **Gray TA.** 2015. Leaderless Transcripts and Small Proteins Are Common  
1044 Features of the Mycobacterial Translational Landscape. *PLoS Genet*  
1045 **11**:e1005641.
- 1046 68. **Chong YH, Jung JM, Choi W, Park CW, Choi KS, Suh YH.** 1994. Bacterial  
1047 expression, purification of full length and carboxyl terminal fragment of Alzheimer  
1048 amyloid precursor protein and their proteolytic processing by thrombin. *Life Sci*  
1049 **54**:1259-1268.
- 1050 69. **Darwin AJ, Miller VL.** 2001. The psp locus of *Yersinia enterocolitica* is required  
1051 for virulence and for growth in vitro when the Ysc type III secretion system is  
1052 produced. *Mol Microbiol* **39**:429-444.
- 1053 70. **Garbe TR, Barathi J, Barnini S, Zhang Y, Abou-Zeid C, Tang D, Mukherjee**  
1054 **R, Young DB.** 1994. Transformation of mycobacterial species using hygromycin  
1055 resistance as selectable marker. *Microbiology* **140**:133-138.
- 1056 71. **Stover CK, de la Cruz VF, Fuerst TR, Burlein JE, Benson LA, Bennett LT,**  
1057 **Bansal GP, Young JF, Lee MH, Hatfull GF, et al.** 1991. New use of BCG for  
1058 recombinant vaccines. *Nature* **351**:456-460.
- 1059
